# Supplementary material for: Vitamin C-induced CO2 capture enables high-rate ethylene production in CO2 electroreduction
Source: PubMed Central journal article supplement (PMC10762245; doi:10.1038/s41467-023-44586-0), 2024-01-02
Supplement: 41467_2023_44586_MOESM1_ESM.pdf [file 41467_2023_44586_MOESM1_ESM.pdf]

## Supplementary Information

# Vitamin C-induced CO<sub>2</sub> capture enables high-rate ethylene production in CO<sub>2</sub> electroreduction

Jongyoun Kim<sup>1,†</sup>, Taemin Lee<sup>1,†</sup>, Hyun Dong Jung<sup>2,†</sup>, Minkyong Kim<sup>1</sup>, Jongsu Eo<sup>1</sup>,  
Byeongjae Kang<sup>1</sup>, Hyeonwoo Jung<sup>1</sup>, Jaehyoung Park<sup>1</sup>, Daewon Bae<sup>1</sup>, Yujin Lee<sup>1</sup>, Sojung Park<sup>3</sup>,  
Wooyul Kim<sup>3</sup>, Seoin Back<sup>2,\*</sup>, Youngu Lee<sup>1,\*</sup> and Dae-Hyun Nam<sup>1,\*</sup>

<sup>1</sup>Department of Energy Science and Engineering, Daegu Gyeongbuk Institute of Science and Technology (DGIST), Daegu, 42988, Republic of Korea

<sup>2</sup>Department of Chemical and Biomolecular Engineering, Institute of Emergent Materials, Sogang University, Seoul, 04107, Republic of Korea

<sup>3</sup>Department of Energy Engineering, Institute for Environmental and Climate Technology, Korea Institute of Energy Technology (KENTECH), Naju, Jeollanam-do, 58330, Republic of Korea

<sup>†</sup>These authors contributed equally to this paper.

\*Corresponding author:

Dae-Hyun Nam, e-mail: dhnam@dgist.ac.kr

Youngu Lee, e-mail: youngulee@dgist.ac.kr

Seoin Back, e-mail: sback@sogang.ac.kr

## Modeling of Electrochemical CO<sub>2</sub> Reduction

To simulate the CO<sub>2</sub> reduction reaction (CO<sub>2</sub>RR) mechanism, we initiated the process with CO<sub>2</sub> adsorption, followed by two protonation steps to form \*COOH and \*CO. Subsequently, we examined the \*CO dimerization, which is reported as the rate-determining step (RDS) for the production of ethylene.<sup>1, 2</sup> Also, the competing hydrogen evolution reaction (HER) was considered.

(R1a, R2a, R3a, R4a, R5a, R6a) and (R1b, R2b, R2c, R3b, R4b, R5b, R5c, R6b, R6c) represent the modeled reactions for Cu (100) and AA/Cu (100), respectively. Using the liquid configuration obtained from the AIMD simulations, we calculated the reaction Gibbs energies for the key reactions. Note that the initial and final states have an identical number of atoms in all cases except for the initial CO<sub>2</sub> adsorption step (1) and the second step of HER (6). The energy of the initial state of CO<sub>2</sub> adsorption was calculated as the sum of energies of the bare surface and gaseous CO<sub>2</sub> molecule and the energy of the final state of H<sub>2</sub> production was calculated as the sum of energies of the bare surface and gaseous H<sub>2</sub> molecule. In the following reaction expressions, \* denotes the catalyst surface.

### (1) CO<sub>2</sub> adsorption

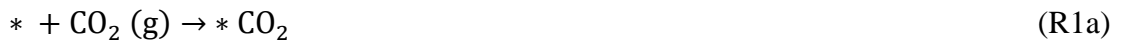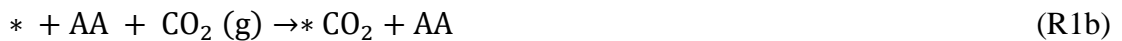

### (2) Protonation of \*CO<sub>2</sub>

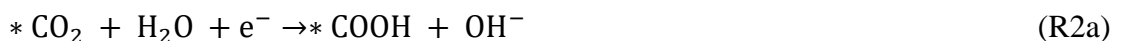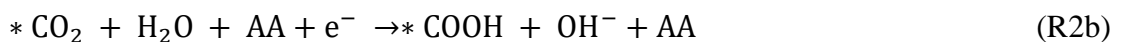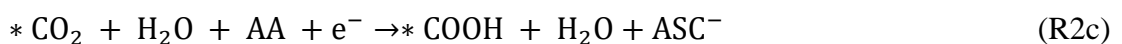

(3) Protonation of \*COOH

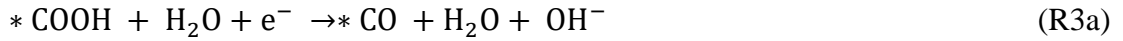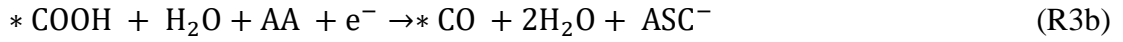

(4) \*CO dimerization

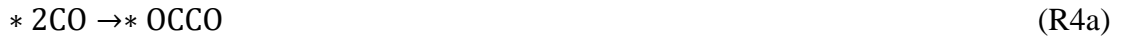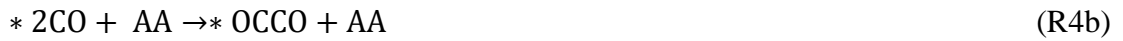

(5) HER (\*H formation)

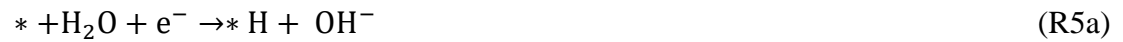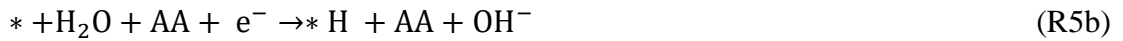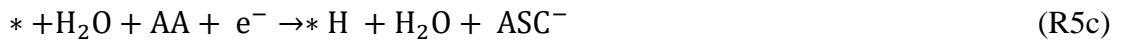

(6) HER (H<sub>2</sub> production)

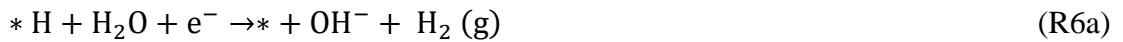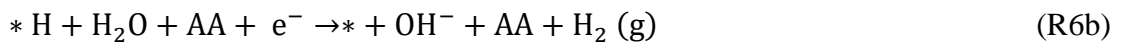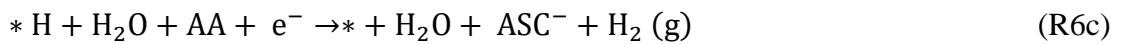

Functional groups in graphene quantum dots (GQDs) can affect CO<sub>2</sub>RR.<sup>3</sup> However, in our work, the effect of GQDs on CO<sub>2</sub>RR is not dominant for cAA-CuNW because most GQDs lost their functional groups by the reduction during AA introduction and the types of GQD functional groups are less controlled. Therefore, since the presence of GQDs is not expected to have a significant impact on the DFT results, we excluded GQDs from the simulation model.

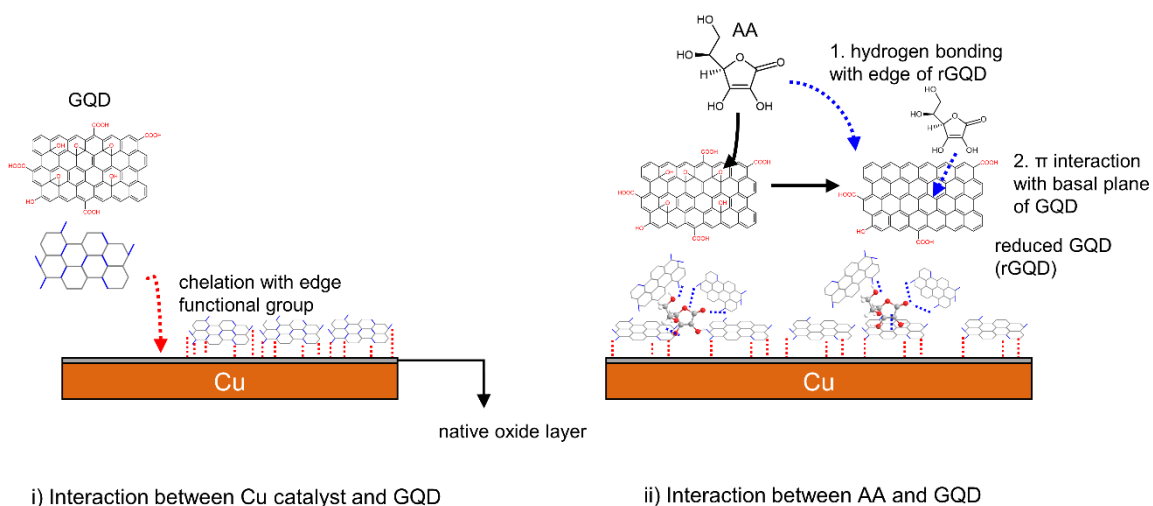

**Supplementary Fig. 1** | Schematic illustration of the interaction between AA, GQDs, and Cu surface.

The functional groups of GQDs such as hydroxyl and carboxyl group can be interacted and chelated to the nanometer-scale native oxide layer on the Cu surface.<sup>4,5</sup> In the reaction between GQD and AA, AA removes impure oxygenated functional group in GQD through nucleophilic substitution ( $S_N2$ ) reaction and reduces GQD through thermal elimination.<sup>6,7</sup> Since the reaction between AA and GQD proceeded for 1 h at 95°C, most intermediates formed during the  $S_N2$  reaction were eliminated.

The reduced GQDs can be combined with AA via physisorption, such as  $\pi$  interaction at the basal plane or hydrogen bonding with edge functional groups. Molecules with endiol groups (e.g. catechol), carboxyl group, or aromatic rings can form 2-dimensional supramolecular systems with reduced graphene through  $\pi$  interaction or hydrogen bonding.<sup>8-11</sup>

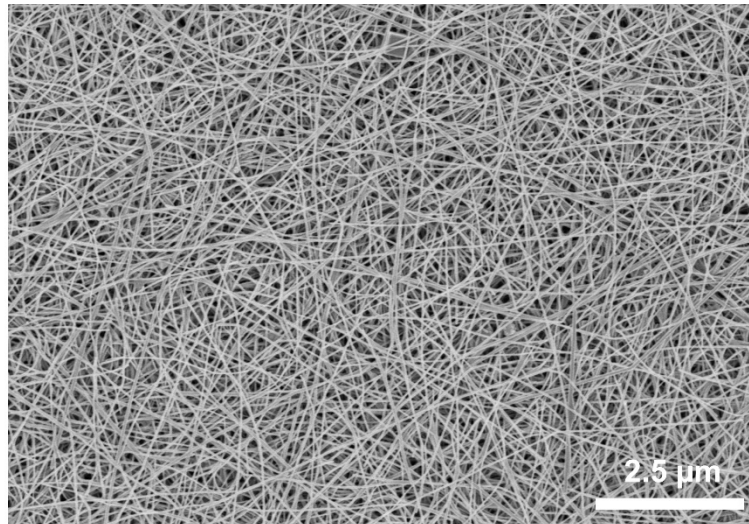

**Supplementary Fig. 2 | SEM image of as-synthesized cAA-CuNW.** SEM image shows the surface structure and uniform distribution of CuNWs with AA and GQDs.

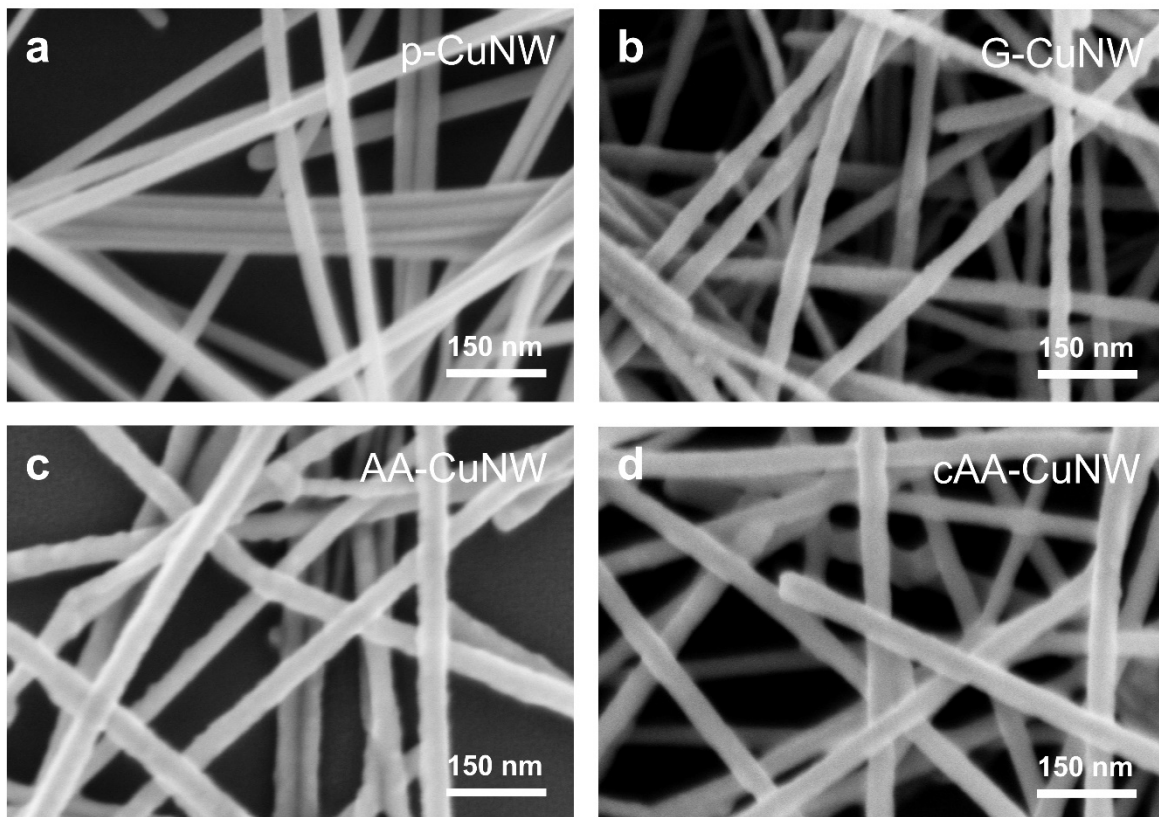

**Supplementary Fig. 3 | SEM images of as-synthesized CuNWs according to the degree of surface hybridization.** SEM images of (a) p-CuNW, (b) G-CuNW, (c) AA-CuNW, and (d) cAA-CuNW. All CuNWs were prepared by a sonication-mediated wrapping method. There was no significant deformation in their one-dimensional (1D) morphology.

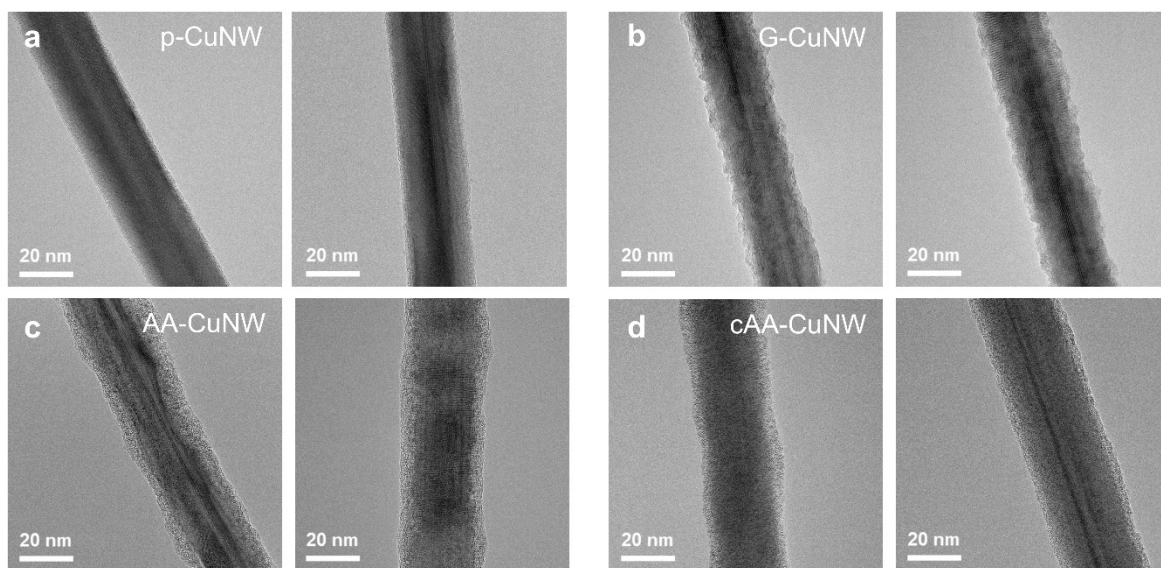

**Supplementary Fig. 4 | TEM images of as-synthesized CuNW according to the degree of surface hybridization.** The surface nanostructure of each CuNW was investigated as TEM images of (a) p-CuNW, (b) G-CuNW, (c) AA-CuNW, and (d) cAA-CuNW.

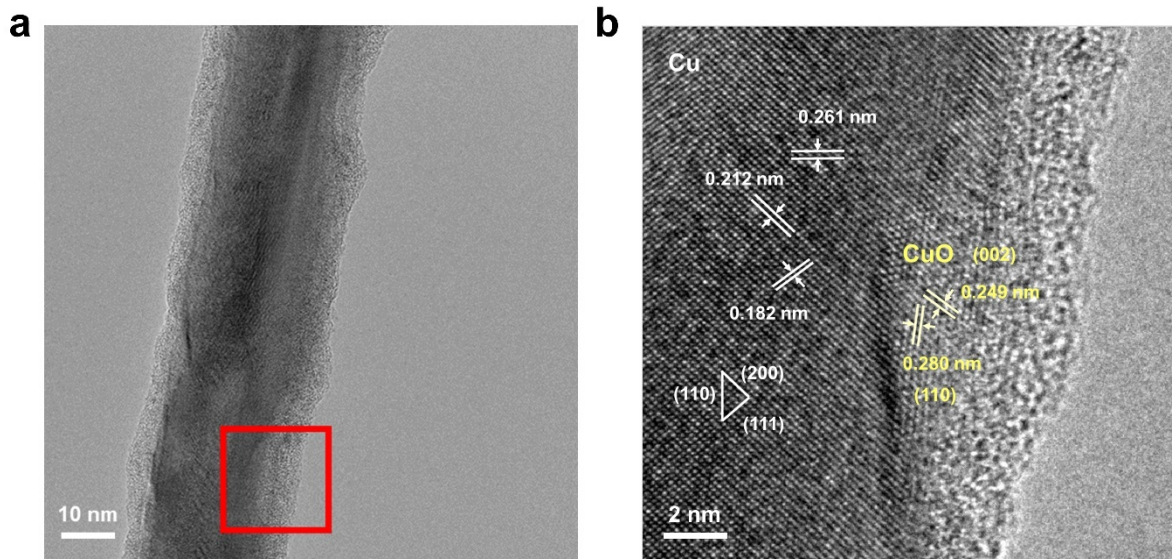

**Supplementary Fig. 5 | Surface Cu oxidation during the synthesis of AA-CuNW. a** TEM image of the oxidized AA-CuNW. **b** Magnified TEM image at the surface area of AA-CuNW.



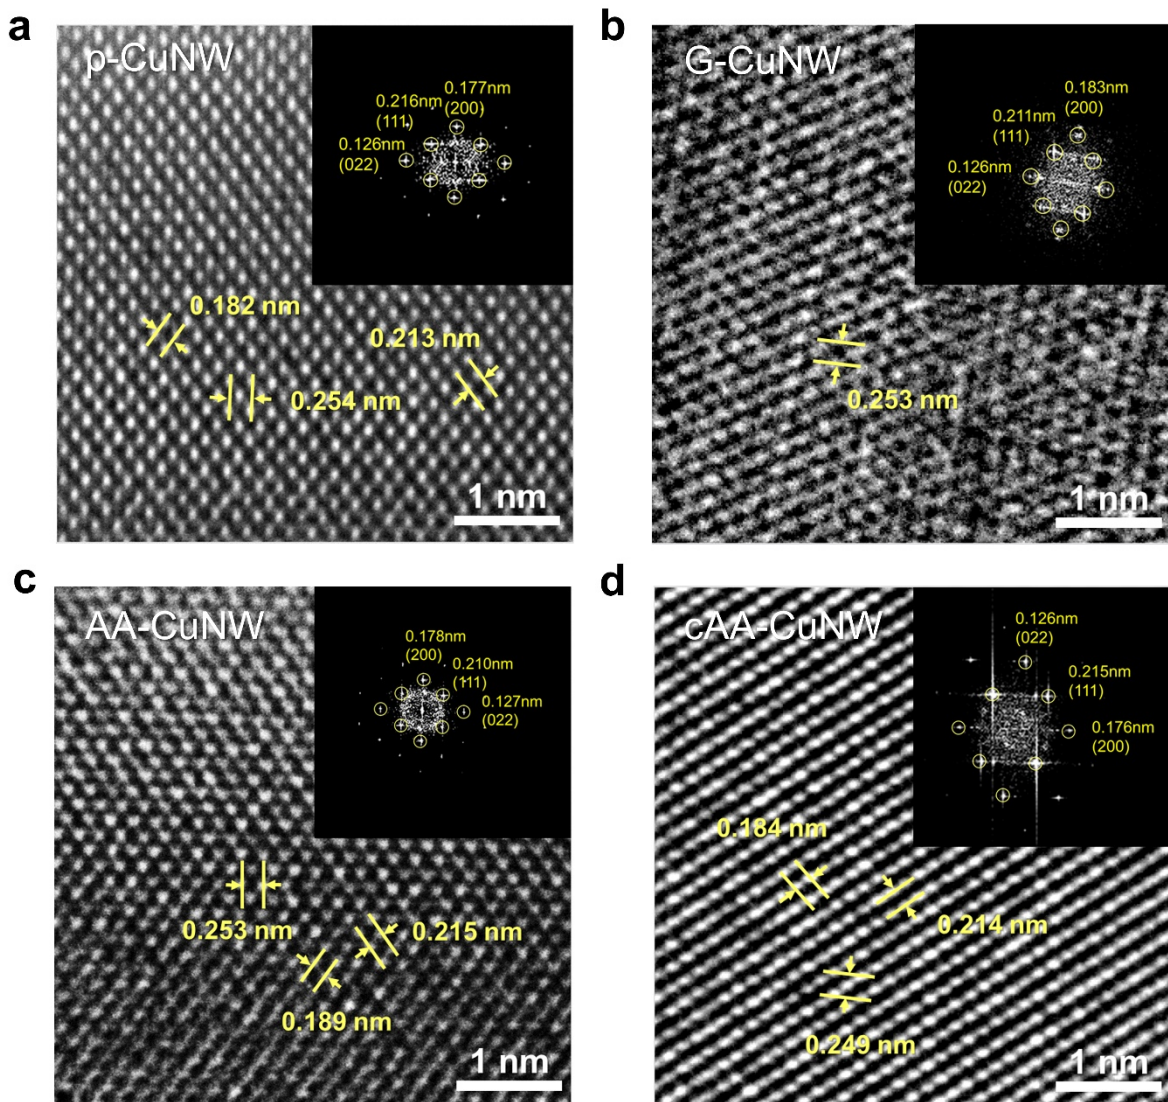

**Supplementary Fig. 6 | High-resolution (HR) TEM images of CuNW to investigate the crystalline phase and atomic arrangement.** Crystal structures of the core Cu in (a) p-CuNW, (b) G-CuNW, (c) AA-CuNW, and (d) cAA-CuNW. Inset: Fast Fourier transform (FFT) image of the corresponding pure Cu phase.

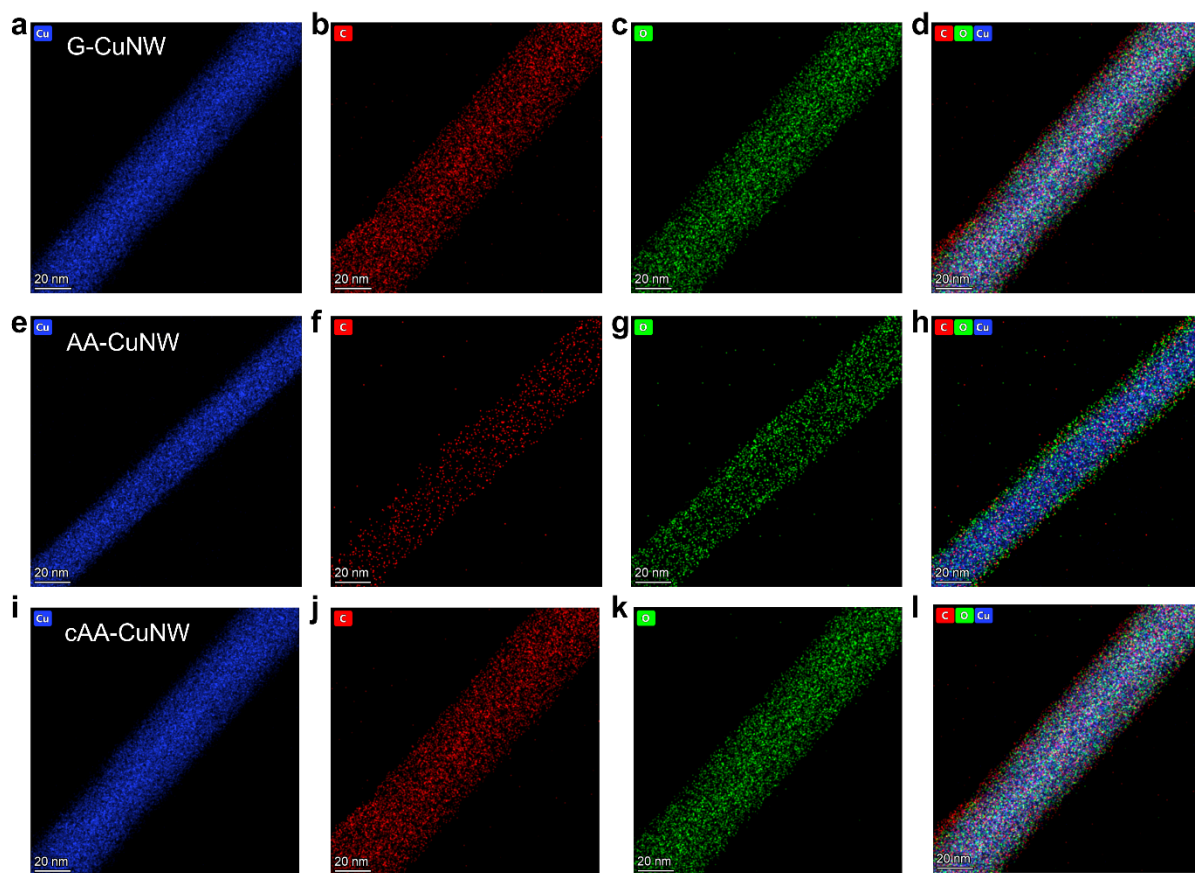

**Supplementary Fig. 7 | Cu, C, O elemental distributions of CuNWs.** TEM EDS mapping of Cu, C, O, and the combination of Cu-C-O for (a–d) G-CuNW, (e–h) AA-CuNW, and (i–l) cAA-CuNW, respectively.

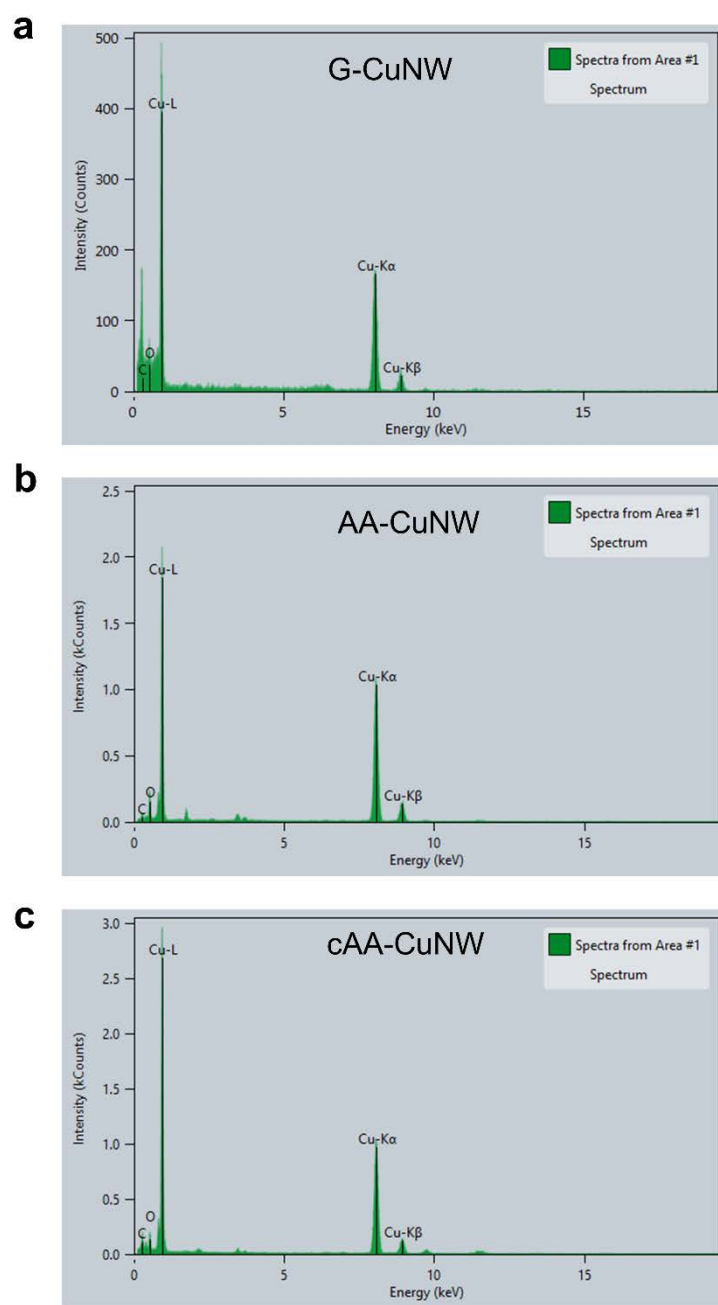

**Supplementary Fig. 8 | TEM EDS spectrum of CuNWs for atomic fraction analysis.** Atomic elements of Cu, C, and O were detected in (a) G-CuNW, (b) AA-CuNW, and (c) cAA-CuNW.

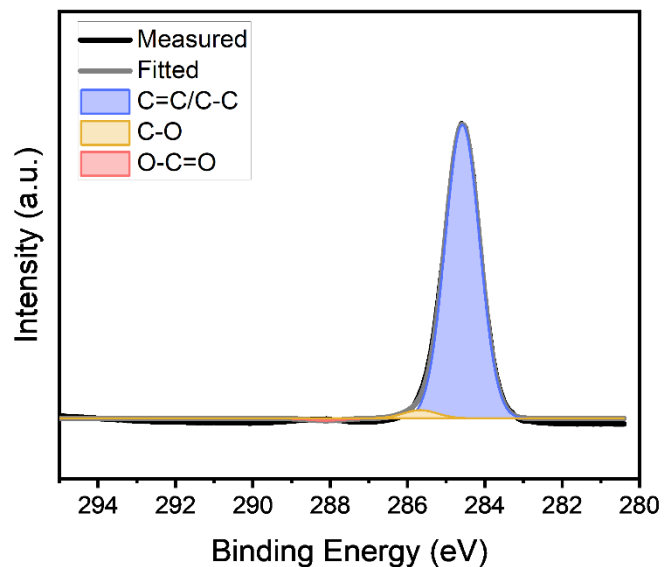

**Supplementary Fig. 9 | C 1s XPS spectra of GQDs separated from cAA-CuNW.** To investigate the oxidation states and chemical bonding of GQD in cAA-CuNW, GQDs were separated from cAA-CuNW via repeated ultrasonication and centrifugation.

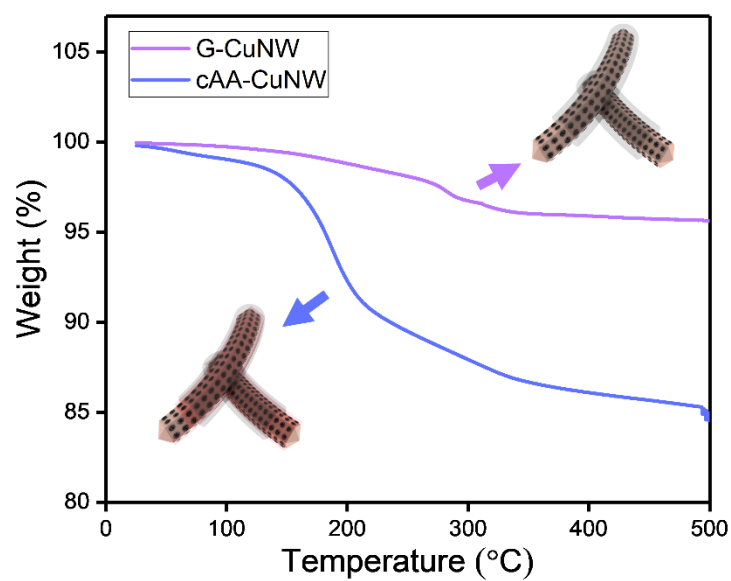

**Supplementary Fig. 10 | TGA analysis of G-CuNW and cAA-CuNW to verify the presence of AA in cAA-CuNW. The large weight loss of cAA-CuNW near 190°C is due to the decomposition of AA.**

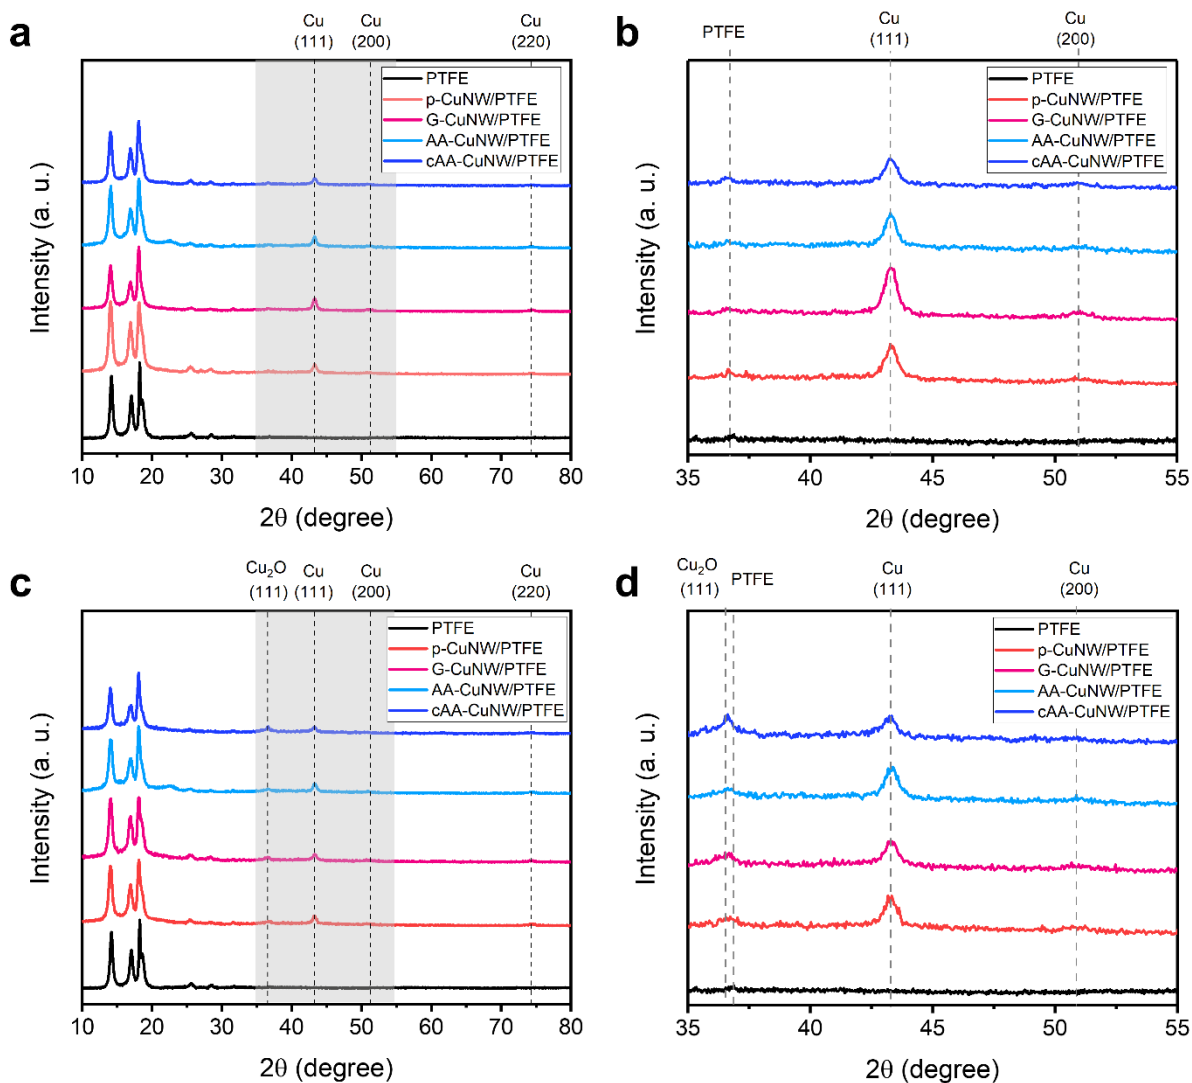

**Supplementary Fig. 11 | Crystal structure analysis of CuNWs after CO<sub>2</sub>RR.** **a** XRD patterns of p-CuNW, G-CuNW, AA-CuNW, and cAA-CuNW on PTFE substrate before CO<sub>2</sub>RR. **b** Magnified XRD patterns of each sample before CO<sub>2</sub>RR. **c** XRD patterns of p-CuNW, G-CuNW, AA-CuNW, and cAA-CuNW on PTFE substrate after CO<sub>2</sub>RR. **d** Magnified XRD patterns of each sample after CO<sub>2</sub>RR.

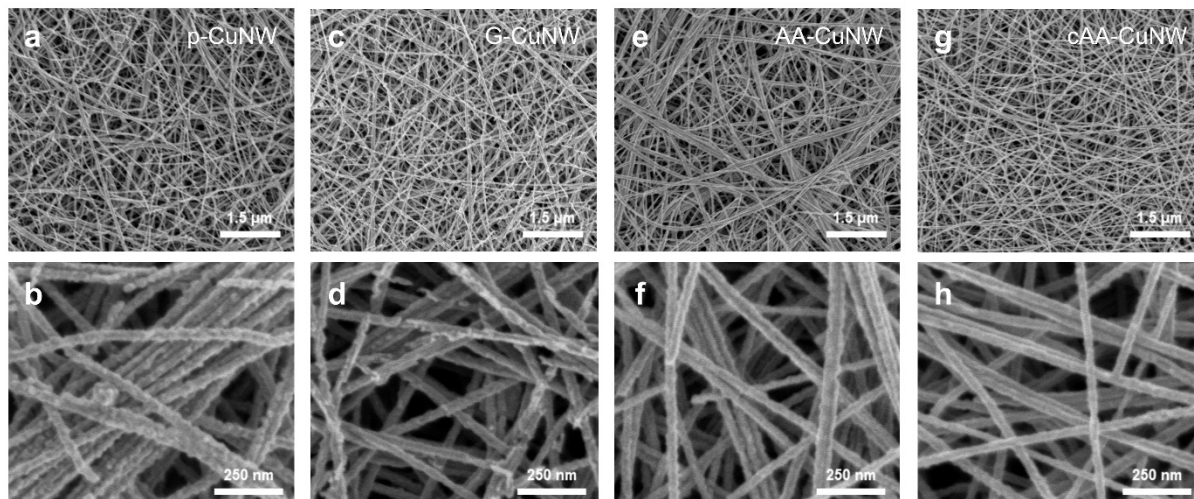

**Supplementary Fig. 12 | Investigation on microstructures of CuNWs after CO<sub>2</sub>RR. SEM (top) and HR-SEM (bottom) images of (a, b) p-CuNW, (c, d) G-CuNW, (e, f) AA-CuNW, and (g, h) cAA-CuNW after CO<sub>2</sub>RR.**

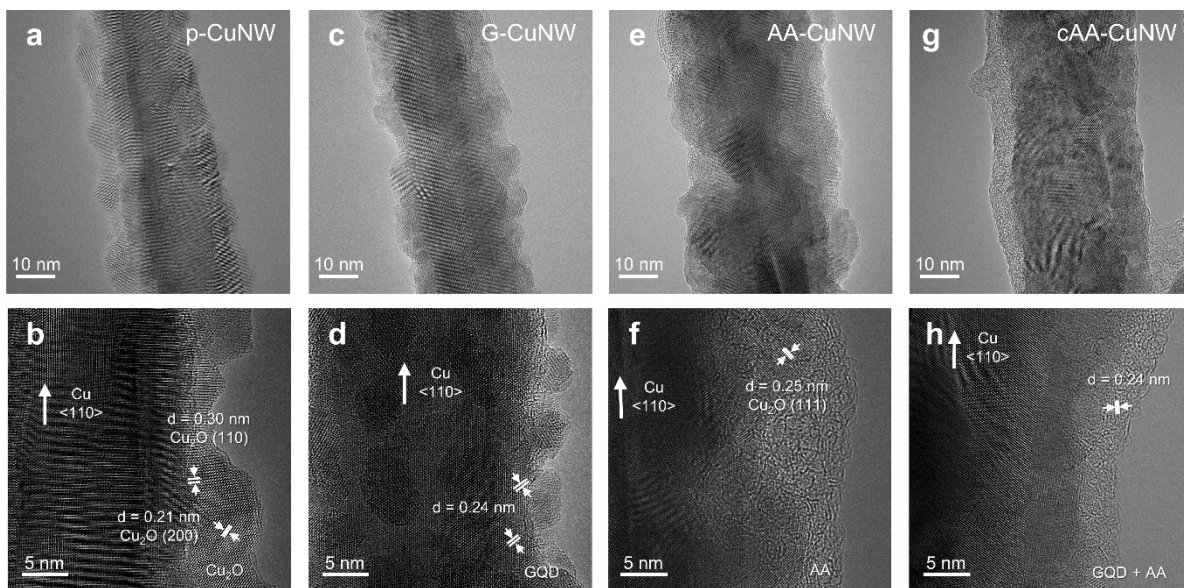

**Supplementary Fig. 13 | Investigation on surface structures of CuNWs after CO<sub>2</sub>RR.** TEM (top) and HR-TEM (bottom) images of (a, b) p-CuNW, (c, d) G-CuNW, (e, f) AA-CuNW, and (g, h) cAA-CuNW after CO<sub>2</sub>RR.



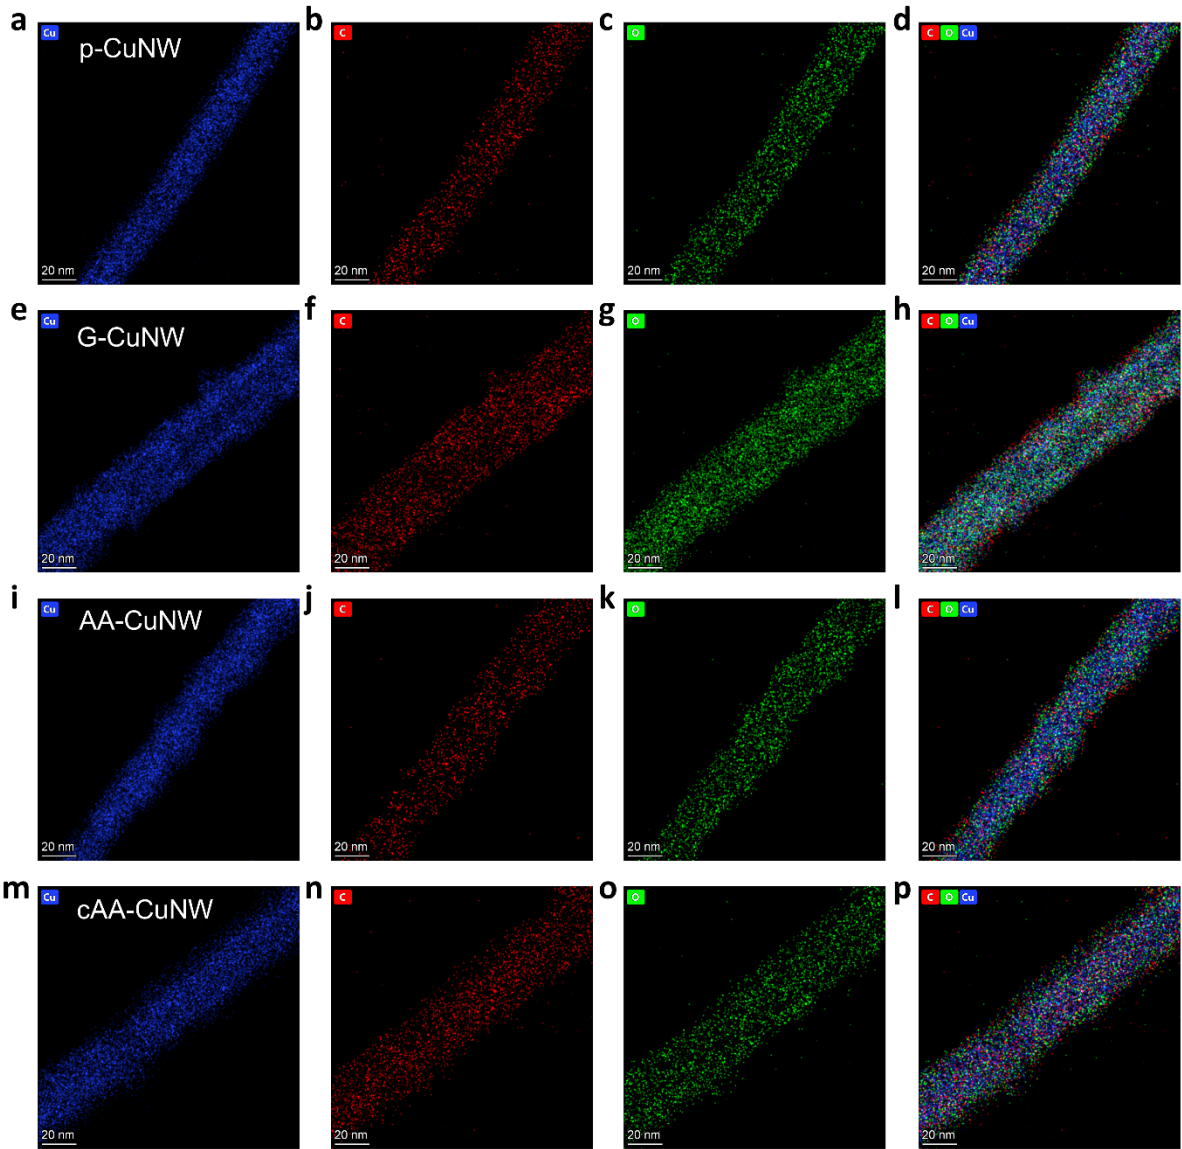

**Supplementary Fig. 14 | Investigation on elemental distribution of CuNWs after CO<sub>2</sub>RR.** TEM EDS mapping of Cu, C, O, and the combination of Cu-C-O for (a–d) p-CuNW, (e–h) G-CuNW, (i–l) AA-CuNW, and (m–p) cAA-CuNW after CO<sub>2</sub>RR, respectively.

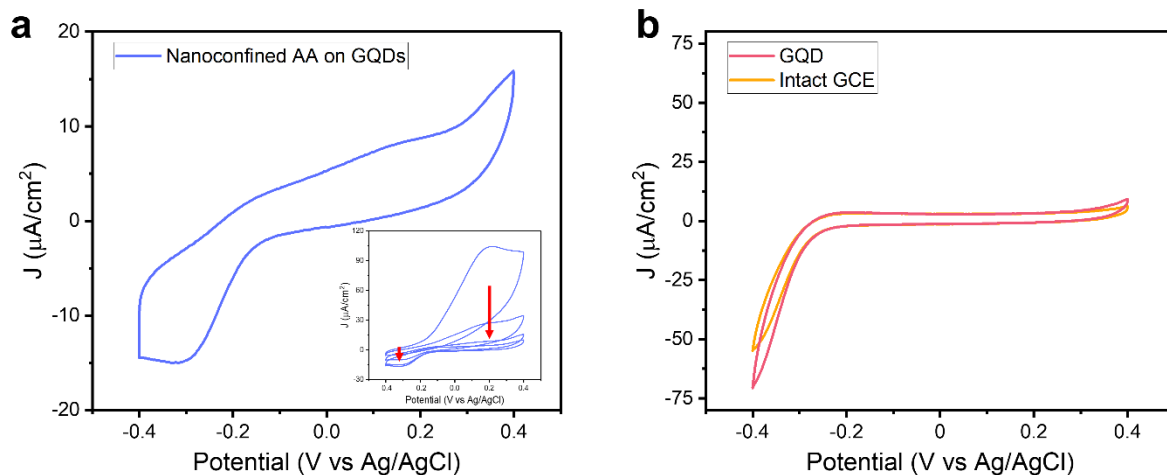

**Supplementary Fig. 15 | Redox behavior of nanoconfined AA on GQDs without gas supply.**  
**a** Cyclic voltammetry (CV) of a GCE coated with nanoconfined AA on GQDs in a 1 M KOH electrolyte. Inset: 2<sup>nd</sup> cycle to 5<sup>th</sup> cycle CV of the GCE coated with nanoconfined AA on GQDs. As the cycle progressed, the integration of the oxidation peak (0.18 V vs Ag/AgCl) gradually decreased, while that of the reduction peak (-0.30 V vs Ag/AgCl) increased. **b** CVs from the intact GCE and GCE coated with GQDs. All CVs were taken from the 3<sup>rd</sup> cycle.

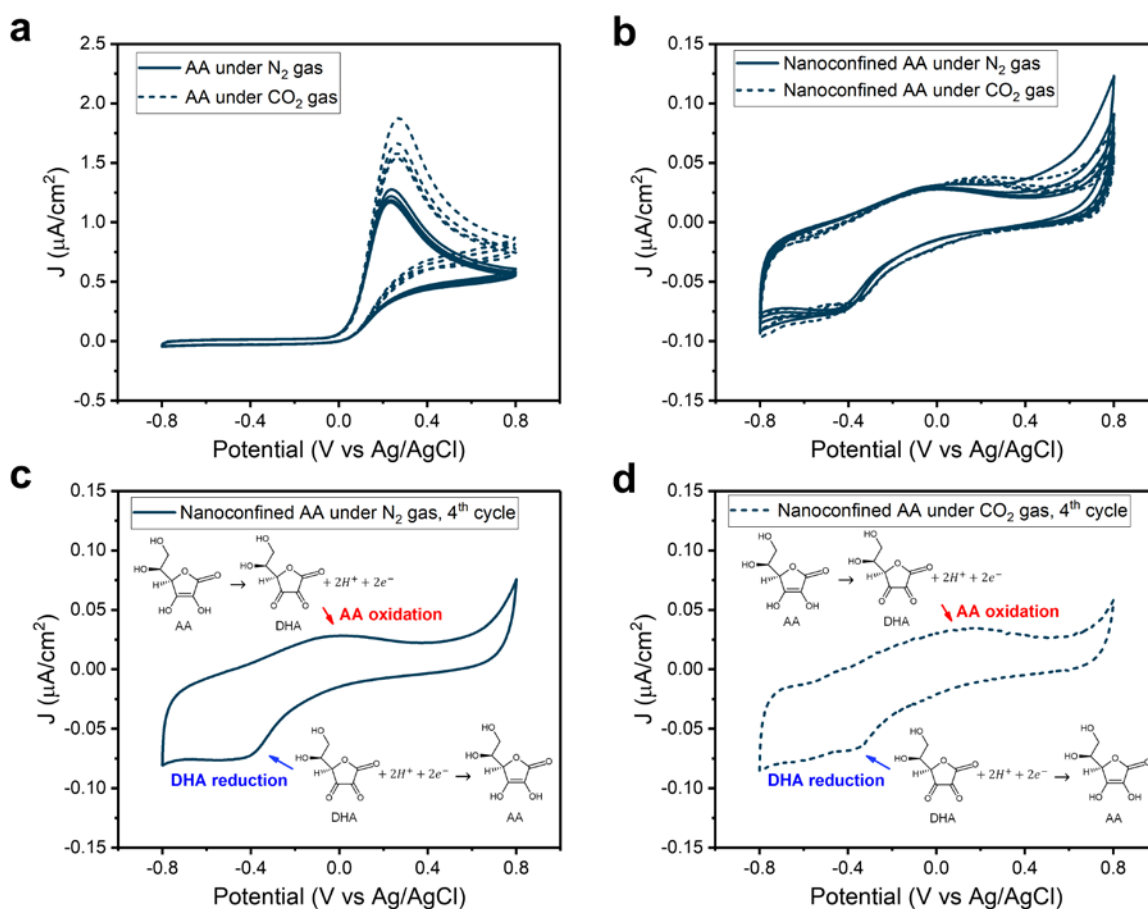

**Supplementary Fig. 16 | Redox behavior of AA and nanoconfined AA on GQDs under N<sub>2</sub> and CO<sub>2</sub> gas.** **a** CV plot of GCE with AA dissolved in 0.1 M KHCO<sub>3</sub> electrolyte. **b** CV plot of GCE coated with nanoconfined AA on GQDs in 0.1 M KHCO<sub>3</sub> electrolyte. 4<sup>th</sup> cycle of the CV plot of GCE coated with nanoconfined AA on GQDs under (c) N<sub>2</sub> and (d) CO<sub>2</sub> gas.

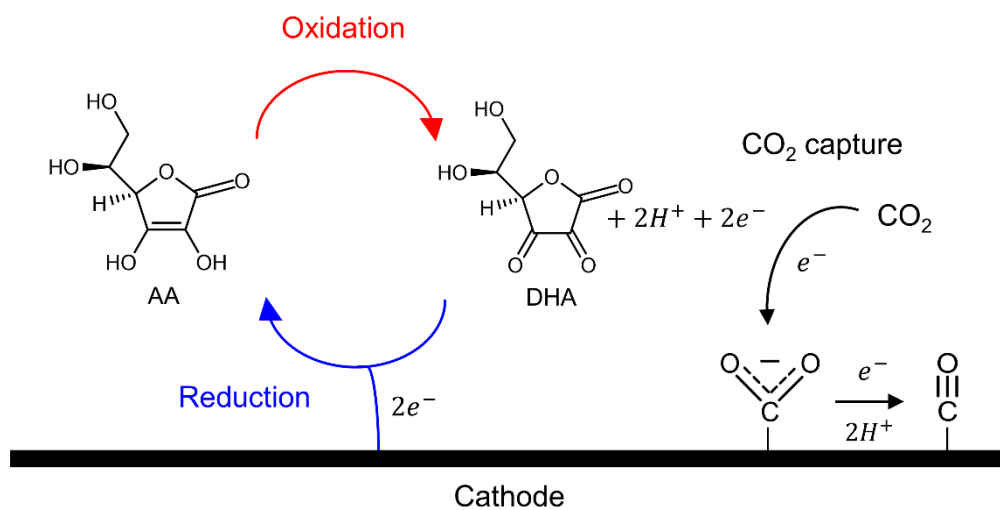

**Supplementary Fig. 17 | Schematic illustration of our strategy for CO<sub>2</sub> capture in atmosphere.** The redox behavior of nanoconfined AA on GQDs contributes to CO<sub>2</sub> capture by promoting CO<sub>2</sub>-to-\*CO conversion during CO<sub>2</sub>RR.

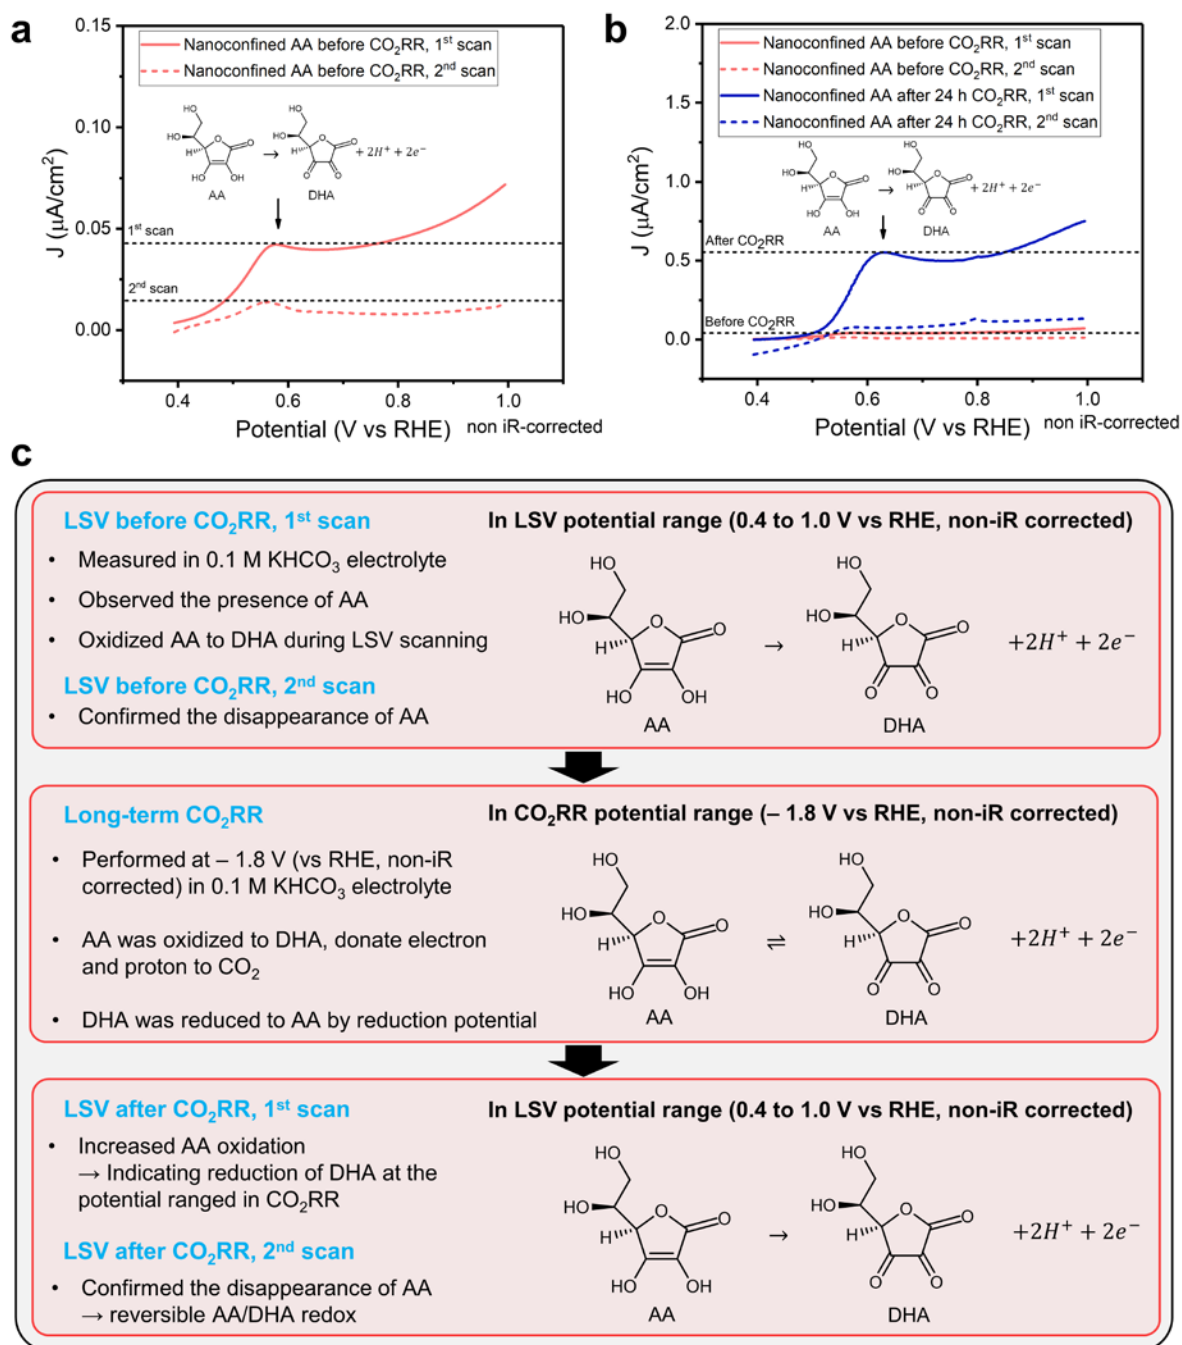

**Supplementary Fig. 18 | Linear sweep voltammetry (LSV) of nanoconfined AA on GQDs before and after CO<sub>2</sub>RR.** LSV of nanoconfined AA on GQDs (a) before and (b) after CO<sub>2</sub>RR in 0.1 M KHCO<sub>3</sub> electrolyte. c Flow chart to investigate the redox behavior of AA/DHA in the potential range of LSV and CO<sub>2</sub>RR. Nanoconfined AA on GQDs was prepared on GCE and CO<sub>2</sub>RR was conducted at a constant potential of -1.8 V (vs RHE, non-iR corrected) in 0.1 M KHCO<sub>3</sub> electrolyte.

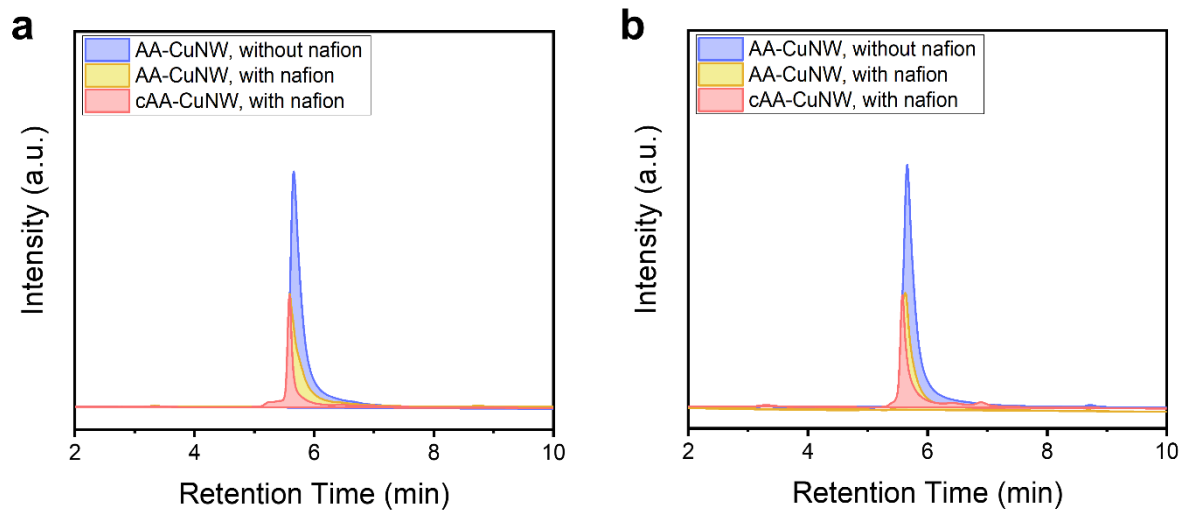

**Supplementary Fig. 19 | HPLC analysis of the extracted solution from AA- and cAA-CuNW to verify the immobilization effect of Nafion on AA.** Chromatographs of the extracted solution with extraction times of (a) 30 and (b) 60 min. The integration of the peak is much larger for CuNW without Nafion.

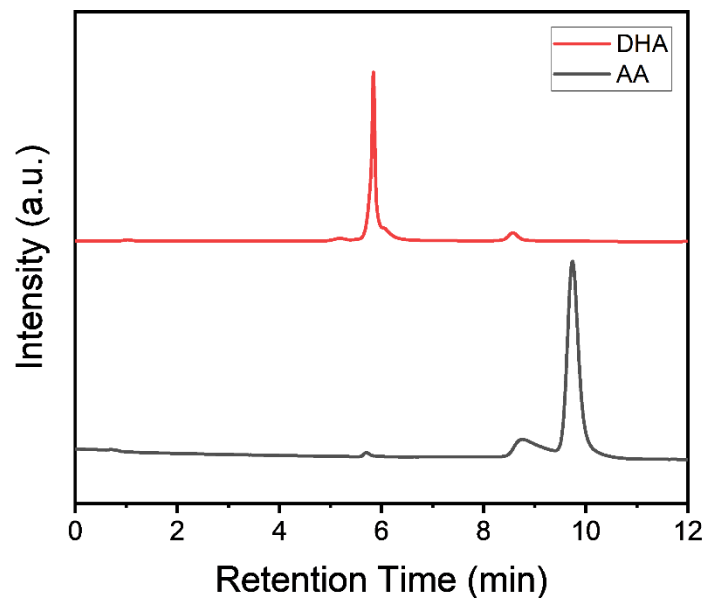

**Supplementary Fig. 20 | HPLC analysis of standard solutions of AA and dehydroascorbic acid (DHA).** The chromatograph shows that the peak with a retention time of ~5.8 min corresponds to DHA under the same HPLC conditions.

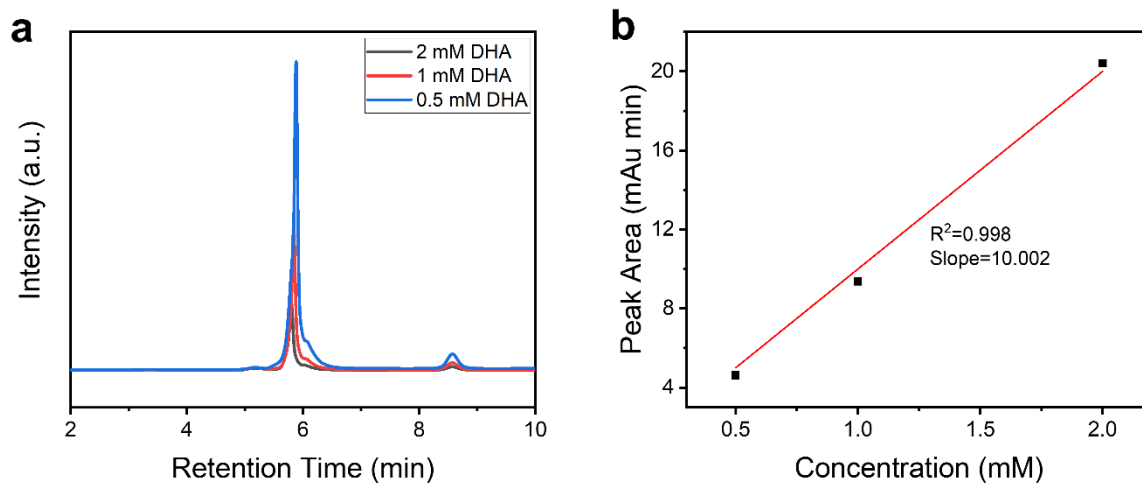

**Supplementary Fig. 21 | HPLC calibration data of DHA.** **a** Chromatograph of DHA solution with concentrations of 0.5, 1, and 2 mM. **b** Calibration curve for DHA. The correlation coefficient ( $R^2$ ) for DHA was 0.998.



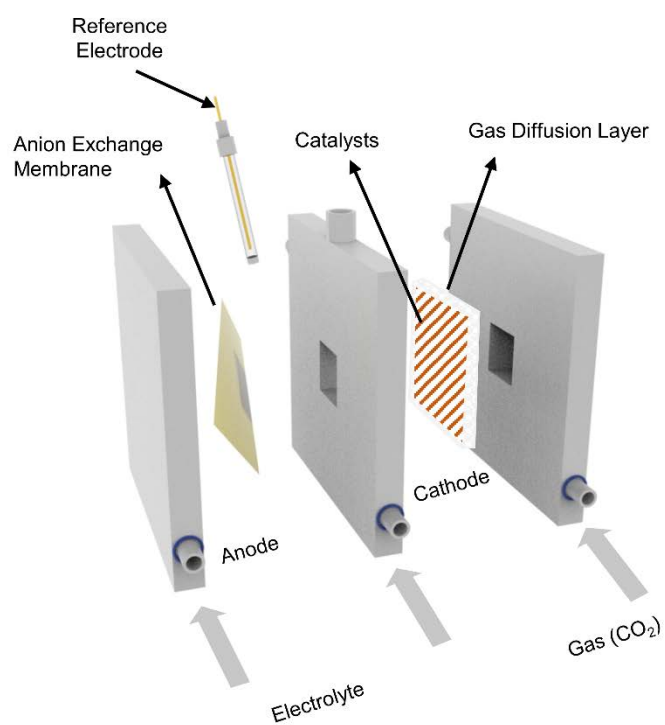

**Supplementary Fig. 22 | Schematic of flow cell components including electrodes and membrane for electrochemical CO<sub>2</sub>RR.** Electrolytes for the cathode and anode are circulated independently, and CO<sub>2</sub> gas is supplied directly to the gas diffusion electrode.

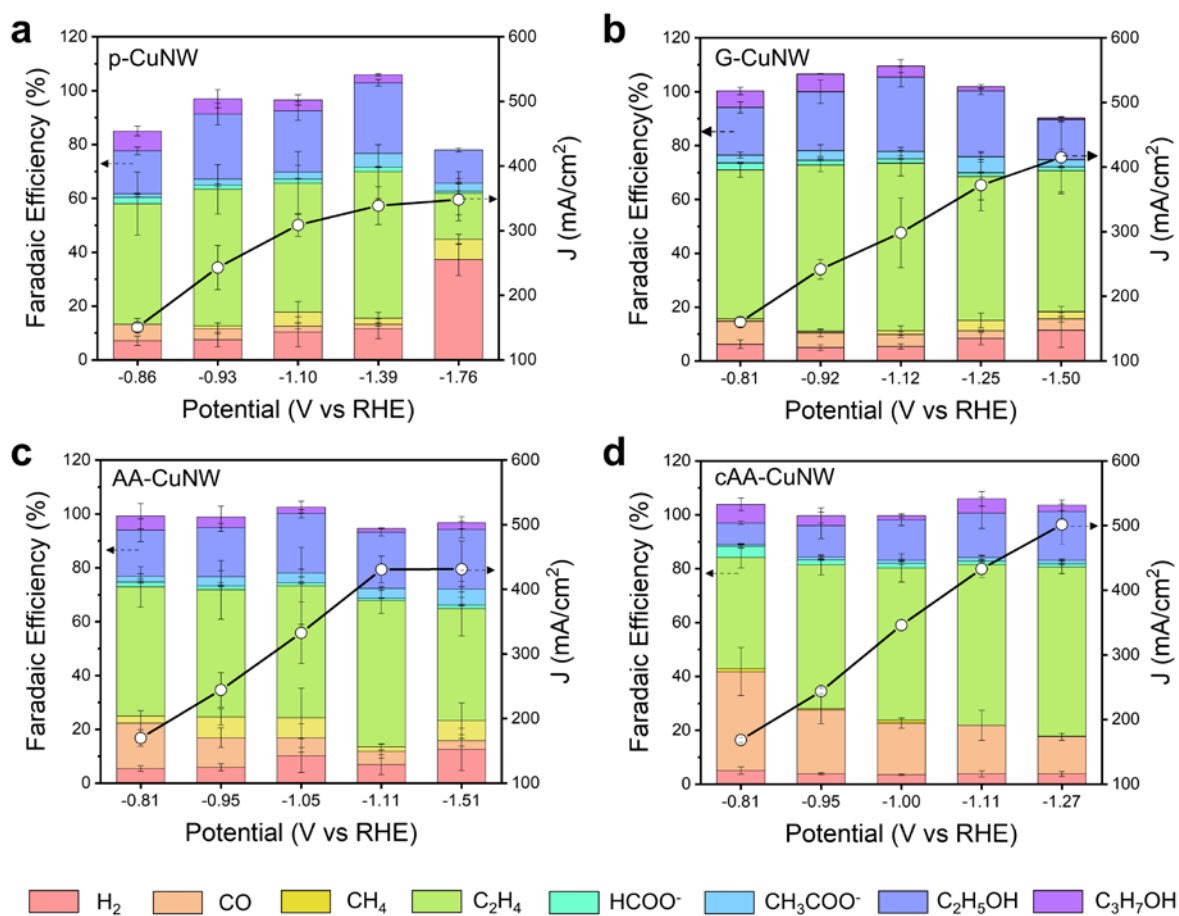

**Supplementary Fig. 23 | Electrochemical CO<sub>2</sub>RR performance of CuNWs.** Faradaic efficiencies (FEs) and current densities for (a) p-CuNW, (b) G-CuNW, (c) AA-CuNW, and (d) cAA-CuNW. All tests were performed in a flow cell electrolyzer with 1 M KOH electrolyte. All the error bars represent standard deviation based on three independent samples.

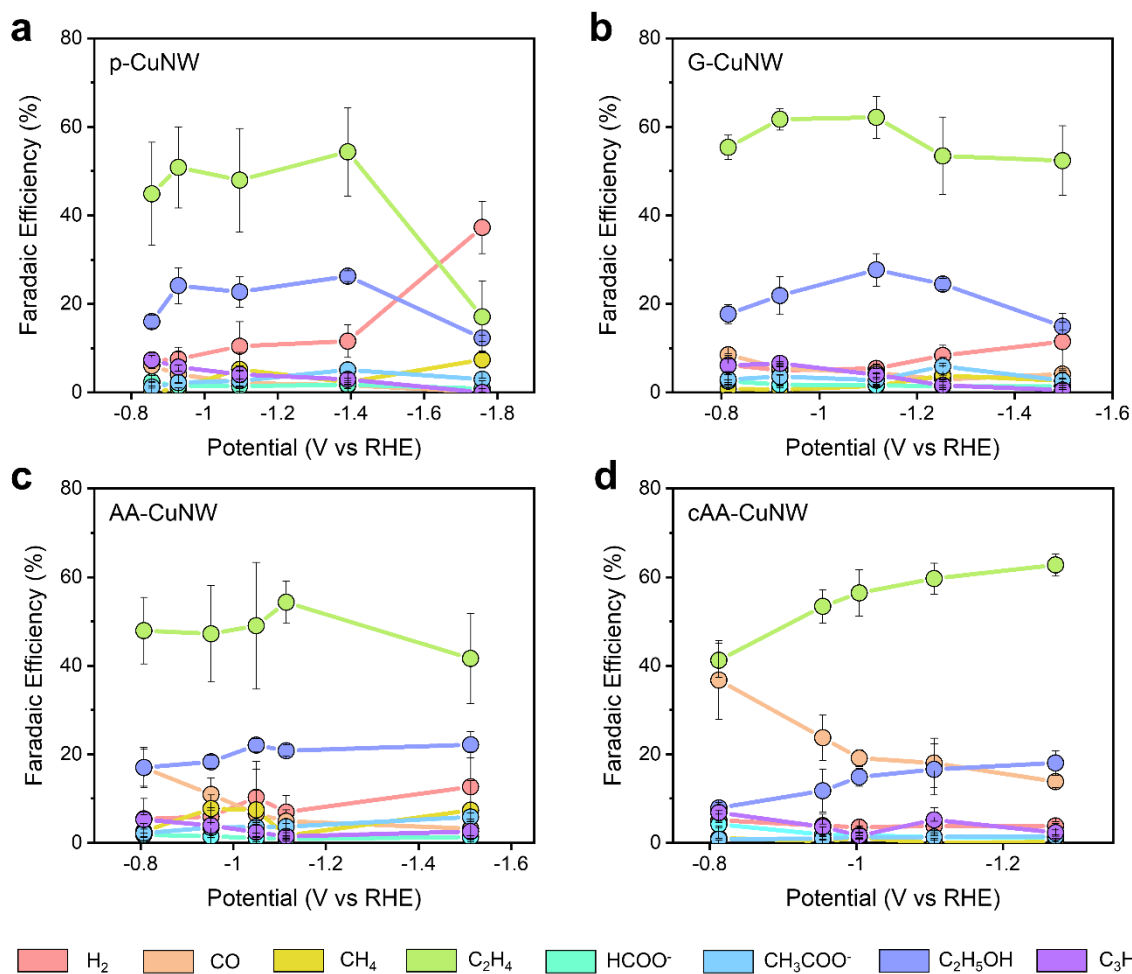

**Supplementary Fig. 24 | Comparisons of the product selectivities.** FEs of CO<sub>2</sub>RR products for (a) p-CuNW, (b) G-CuNW, (c) AA-CuNW, and (d) cAA-CuNW. All the error bars represent standard deviation based on three independent samples.

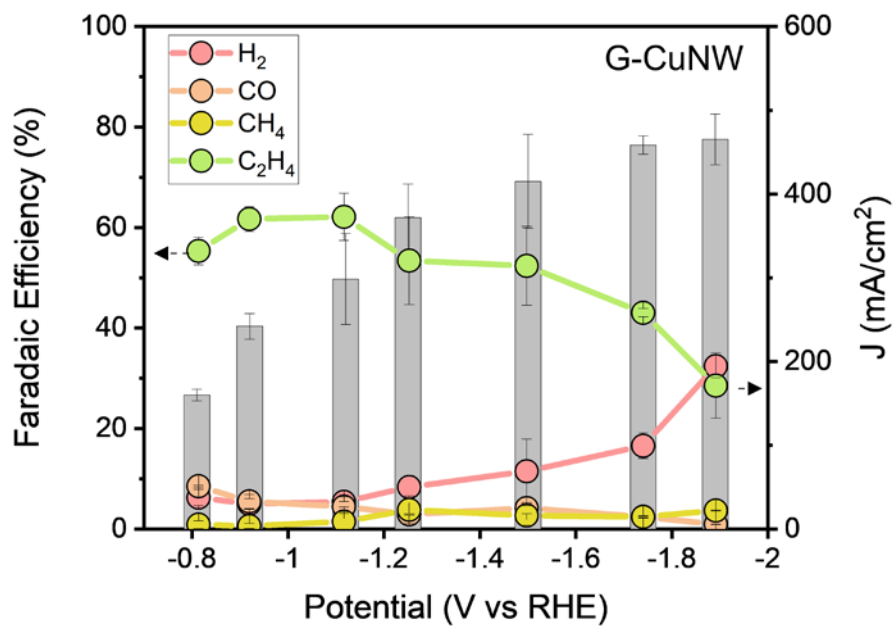

**Supplementary Fig. 25 | Investigation of CO<sub>2</sub>RR of G-CuNW at extended potential range.** Gaseous product FEs and total current densities for G-CuNW up to  $-1.89$  V (vs RHE). All the error bars represent standard deviation based on three independent samples.

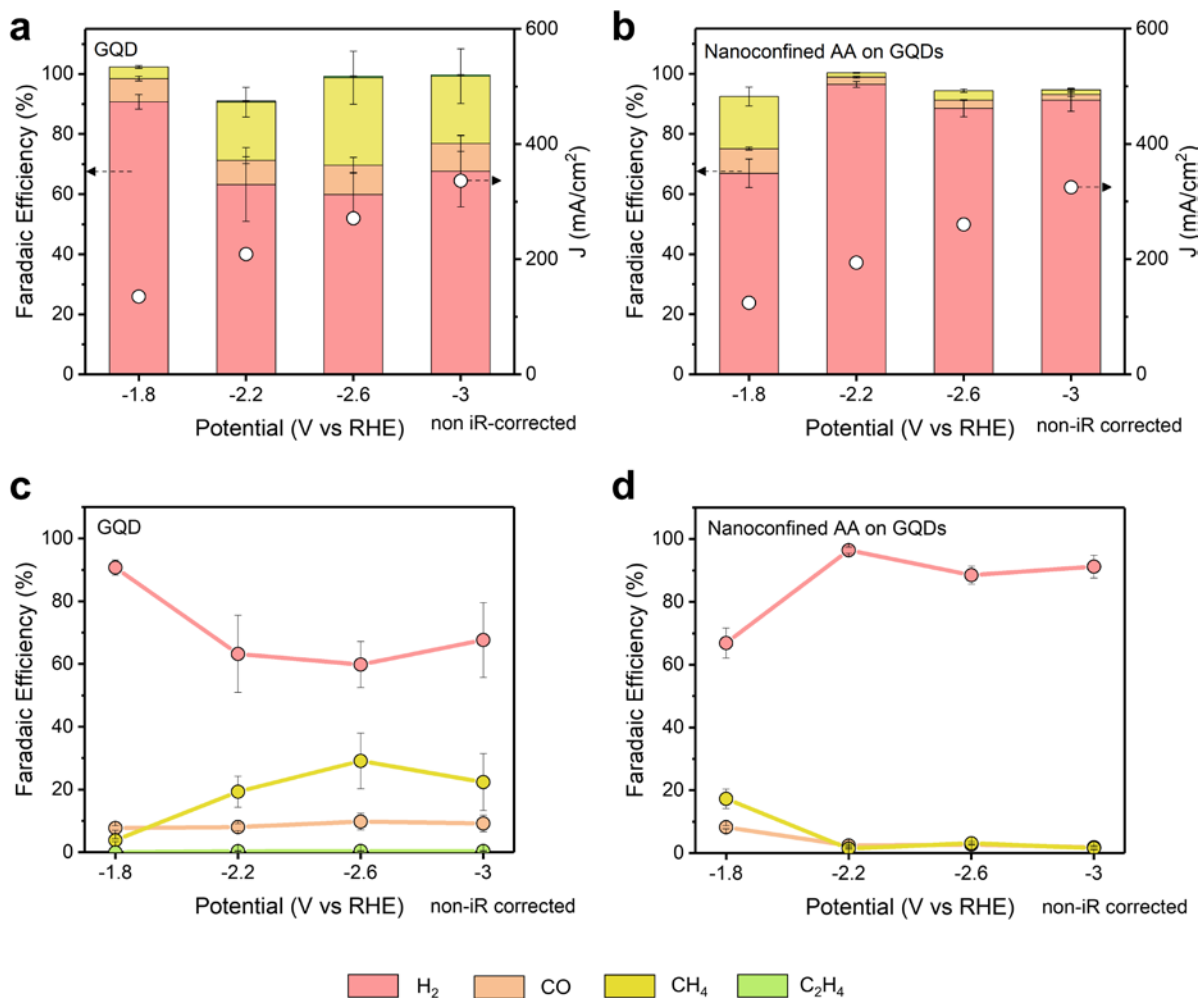

**Supplementary Fig. 26 | Gaseous product selectivity of hybridization materials without CuNW.** FEs of the gaseous products of (a, c) pristine GQD and (b, d) nanoconfined AA on GQDs. The electrodes were fabricated by spray-coating each material on porous carbon paper-based substrates. All the error bars represent standard deviation based on three independent measurements.

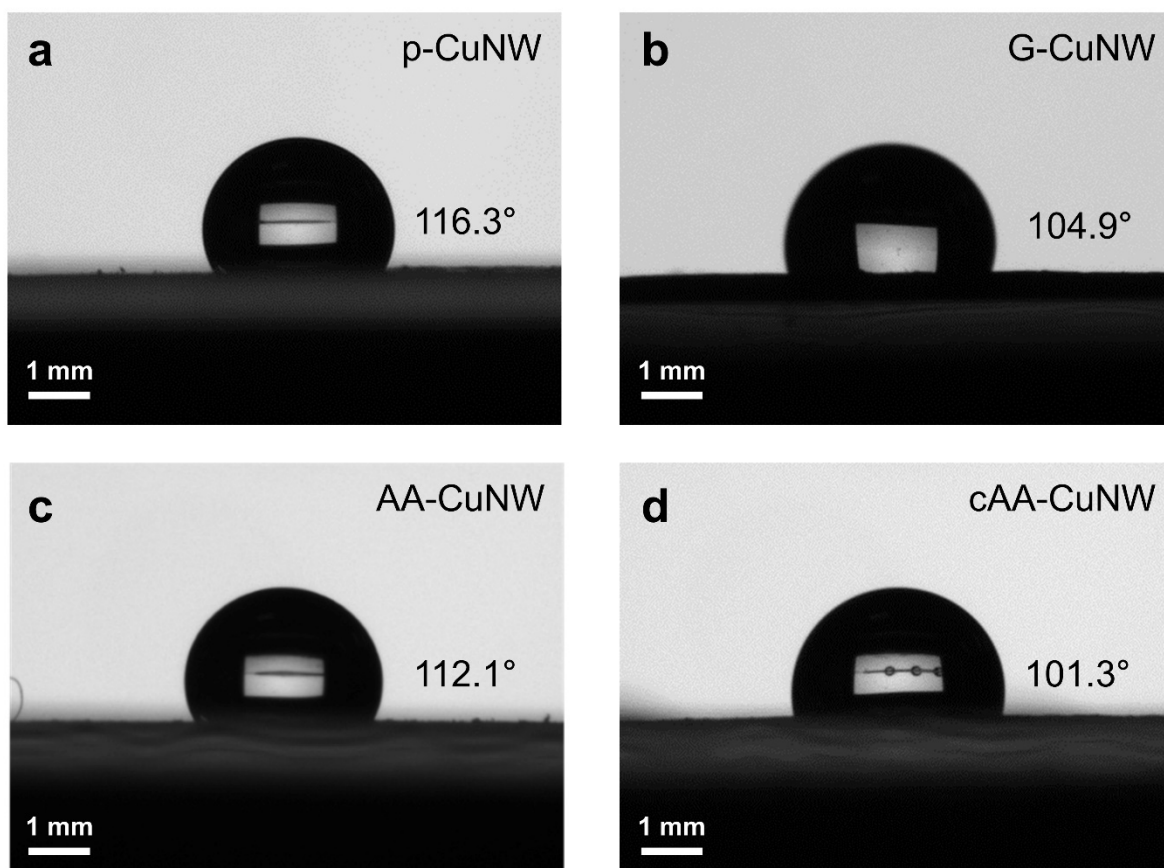

**Supplementary Fig. 27 | Wetting properties of the CuNWs.** Water contact angle of (a) p-CuNW, (b) G-CuNW, (c) AA-CuNW, and (d) cAA-CuNW on PTFE substrates.

Hydrophobicity is an important property of molecular additives in enhancing CO<sub>2</sub> mass transport. Improving the hydrophobicity of the catalyst surface can increase \*CO coverage by participating in kinetic control between \*CO and \*H.<sup>12</sup> However, GQD is hydrophilic due to large amount of oxygen containing functional groups on edge site.<sup>13</sup> The water contact angles of G-CuNW and cAA-CuNW were slightly lower than others due to hydrophilic properties of GQDs. Therefore, the hydrophilic properties of GQDs are not beneficial for high current density CO<sub>2</sub>RR.

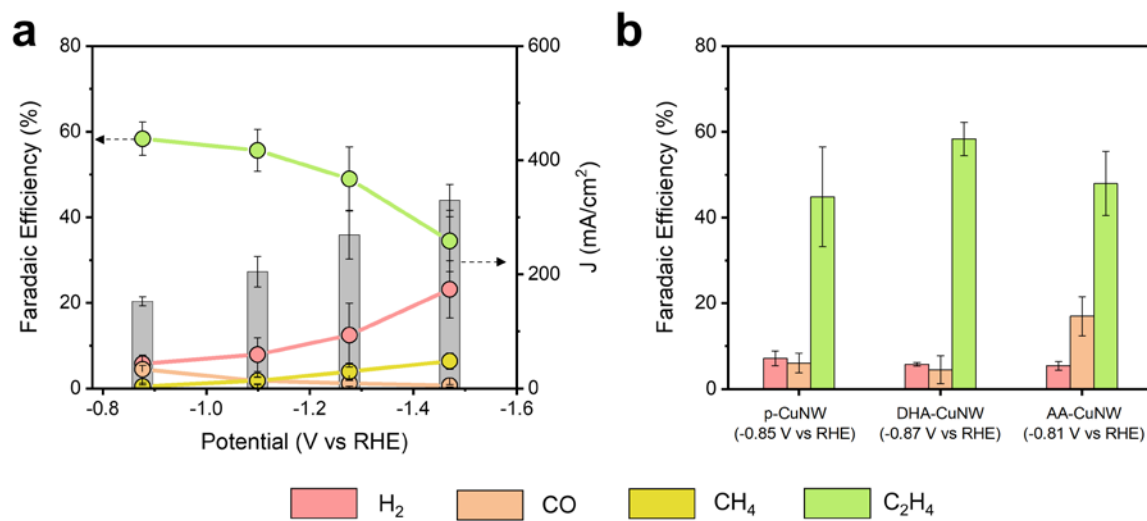

**Supplementary Fig. 28 | Effect of DHA on electrochemical CO<sub>2</sub>RR performance of CuNW. a** Gaseous product FEs and total current densities of DHA-CuNW up to  $-1.47$  V (vs RHE). **b** Comparison of the gaseous product selectivity of p-CuNW, DHA-CuNW, and AA-CuNW. All the error bars represent standard deviation based on three independent samples.

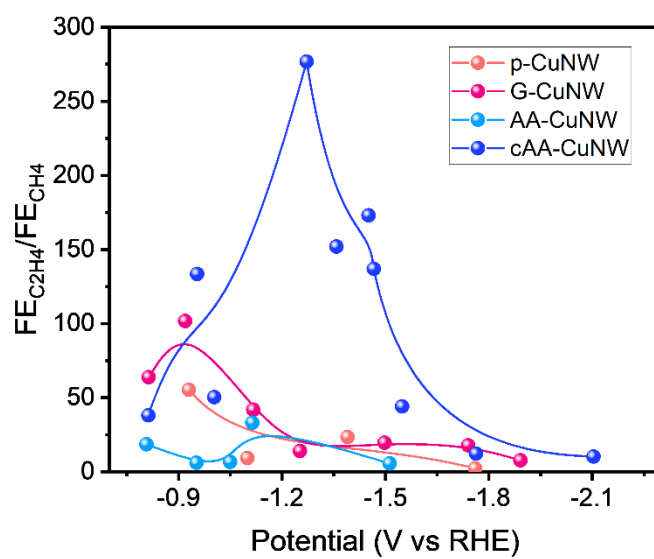

**Supplementary Fig. 29 | Comparison of the C<sub>2</sub>H<sub>4</sub> and CH<sub>4</sub> selectivity of CuNWs.** The ratio of C<sub>2</sub>H<sub>4</sub> FE to CH<sub>4</sub> FE (C<sub>2</sub>H<sub>4</sub> FE/CH<sub>4</sub> FE) in p-CuNW, G-CuNW, AA-CuNW, and cAA-CuNW according to applied potentials.



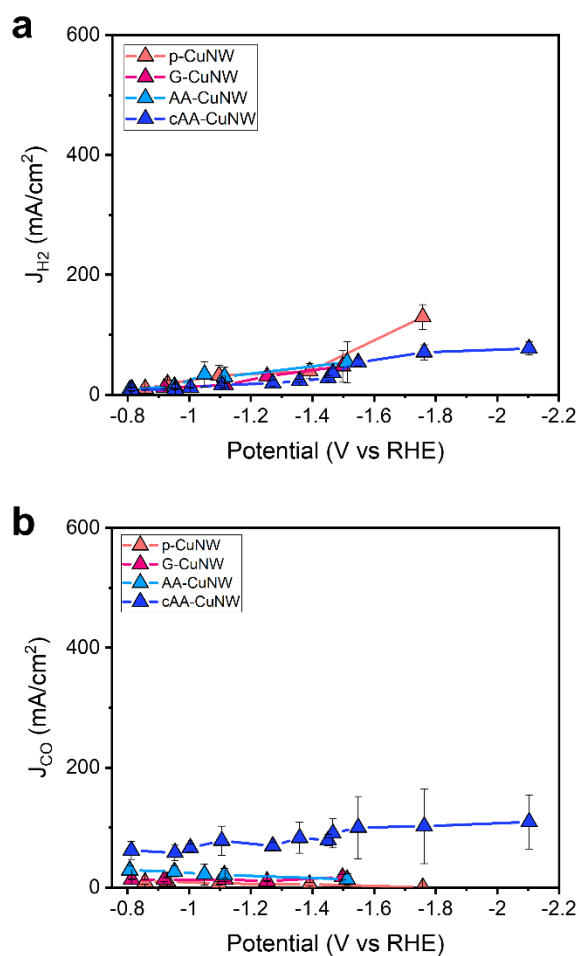

**Supplementary Fig. 30 | Comparisons of the H<sub>2</sub> and CO productivity of CuNWs in CO<sub>2</sub> electrolysis.** Partial current densities versus potentials of p-CuNW, G-CuNW, AA-CuNW, and cAA-CuNW were compared in terms of (a) H<sub>2</sub> and (b) CO. All the error bars represent standard deviation based on three independent samples.

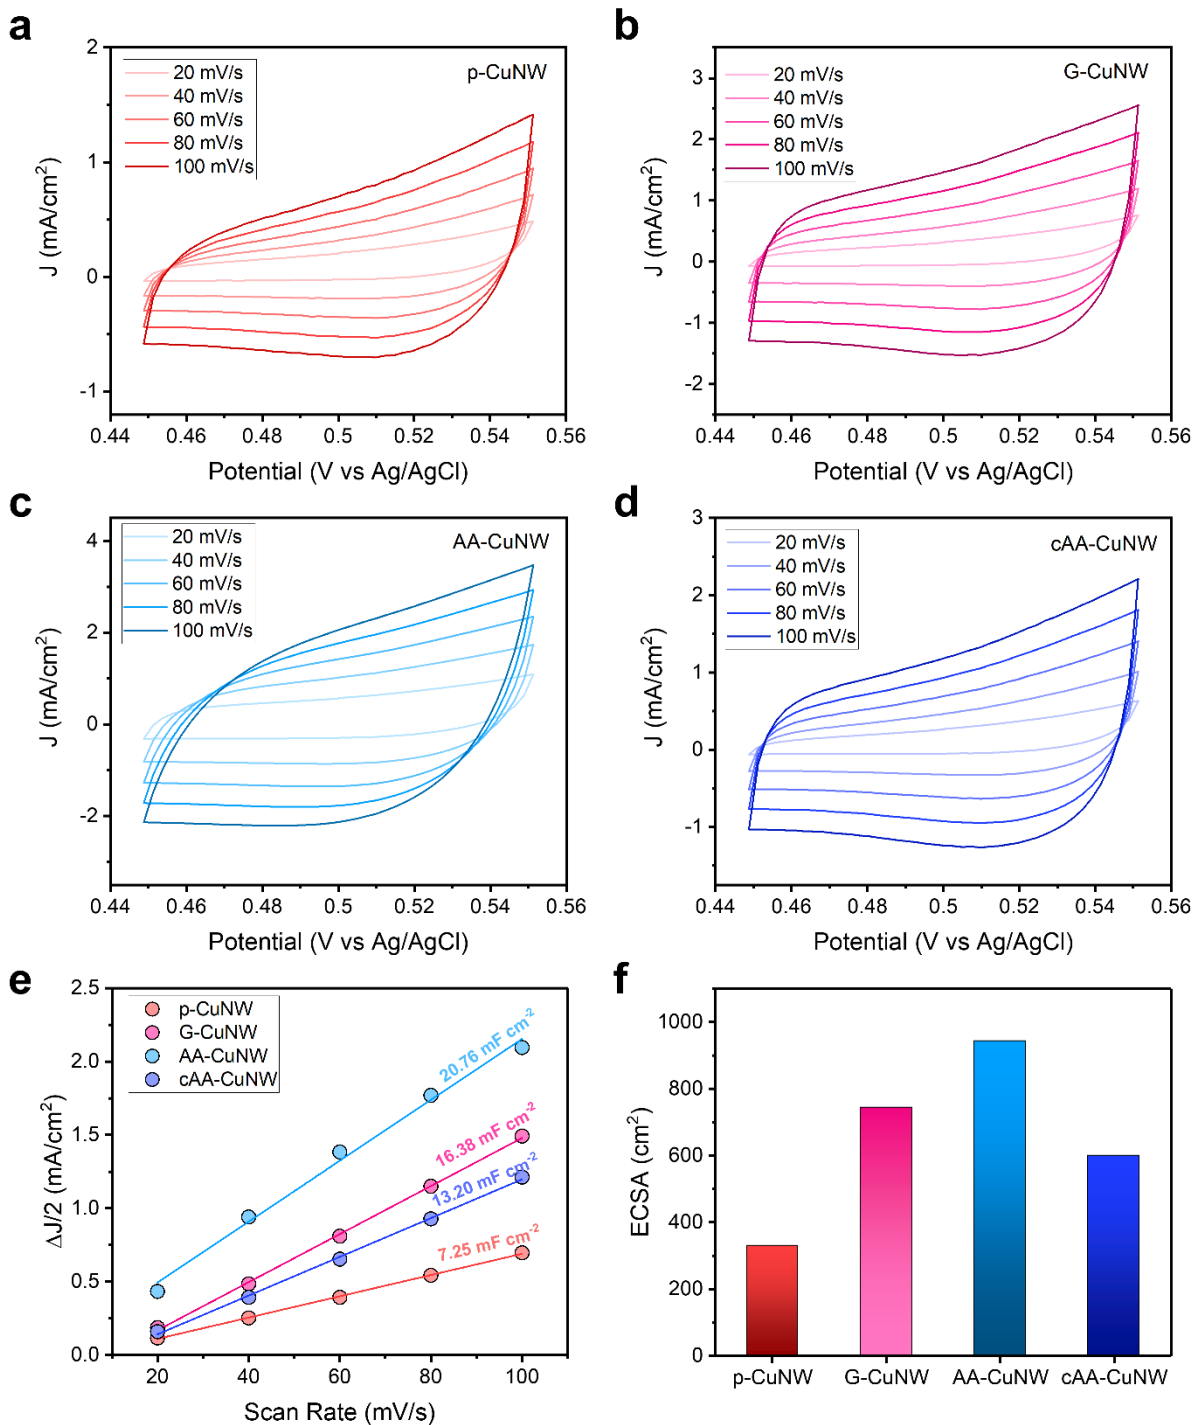

**Supplementary Fig. 31 | Electrochemically active surface area (ECSA) measurement for CuNWs.** CV plot of (a) p-CuNW, (b) G-CuNW, (c) AA-CuNW, and (d) cAA-CuNW in 1 M KOH electrolyte. **e** electrochemical double-layer capacitance ( $C_{dl}$ ) and (f) the calculated ECSA for CuNWs. The ECSA was characterized by calculation of  $C_{dl}$  over specific capacitance ( $C_s$ ), and  $C_{dl}$  was determined from the equation:  $C_{dl} = \Delta j(j_a - j_c)/2v$ , where  $j_a$  and  $j_c$  are anodic and cathodic current densities and  $v$  is the scan rate.  $C_s$  in 1 M KOH electrolyte was assumed as 0.022 mF/cm<sup>2</sup>.

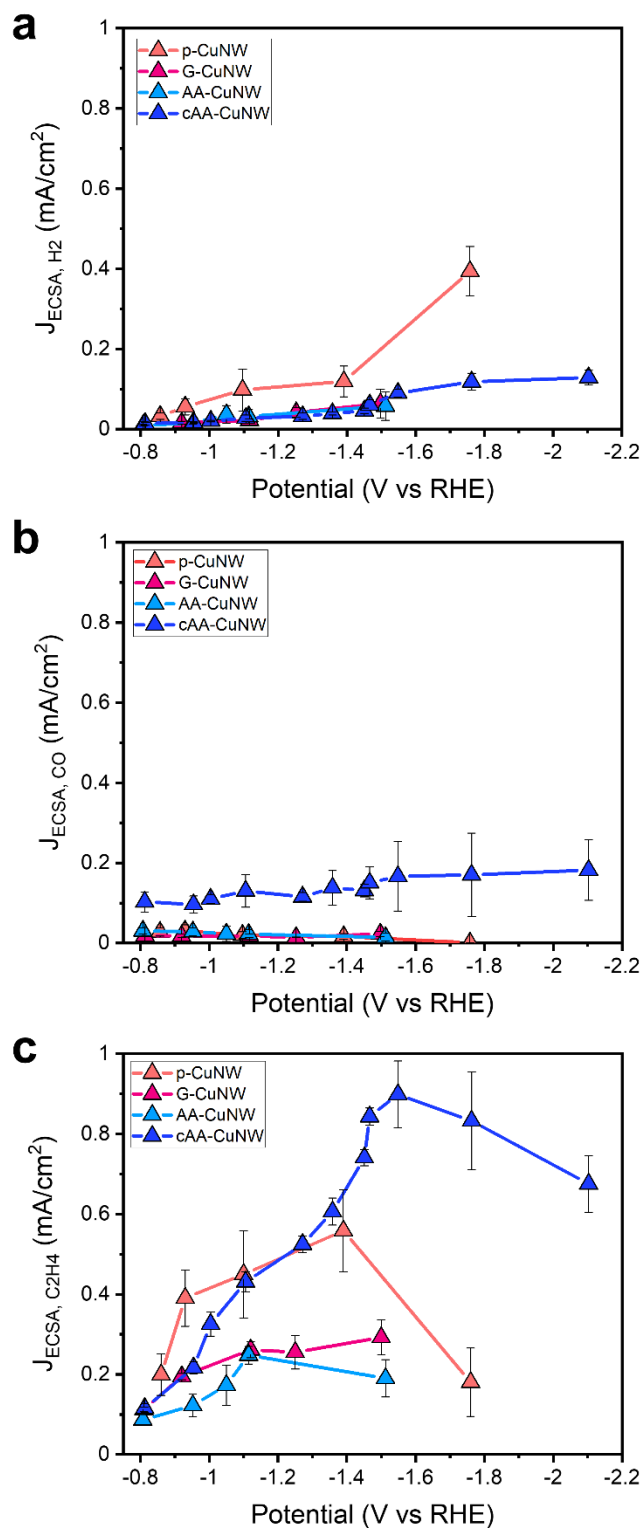

**Supplementary Fig. 32 | Comparison of ECSA-normalized CO<sub>2</sub>RR productivities between CuNWs.** Partial current densities versus potentials of p-CuNW, G-CuNW, AA-CuNW, and cAA-CuNW were compared in terms of (a) H<sub>2</sub>, (b) CO, and (c) C<sub>2</sub>H<sub>4</sub>. All the error bars represent standard deviation based on three independent samples.

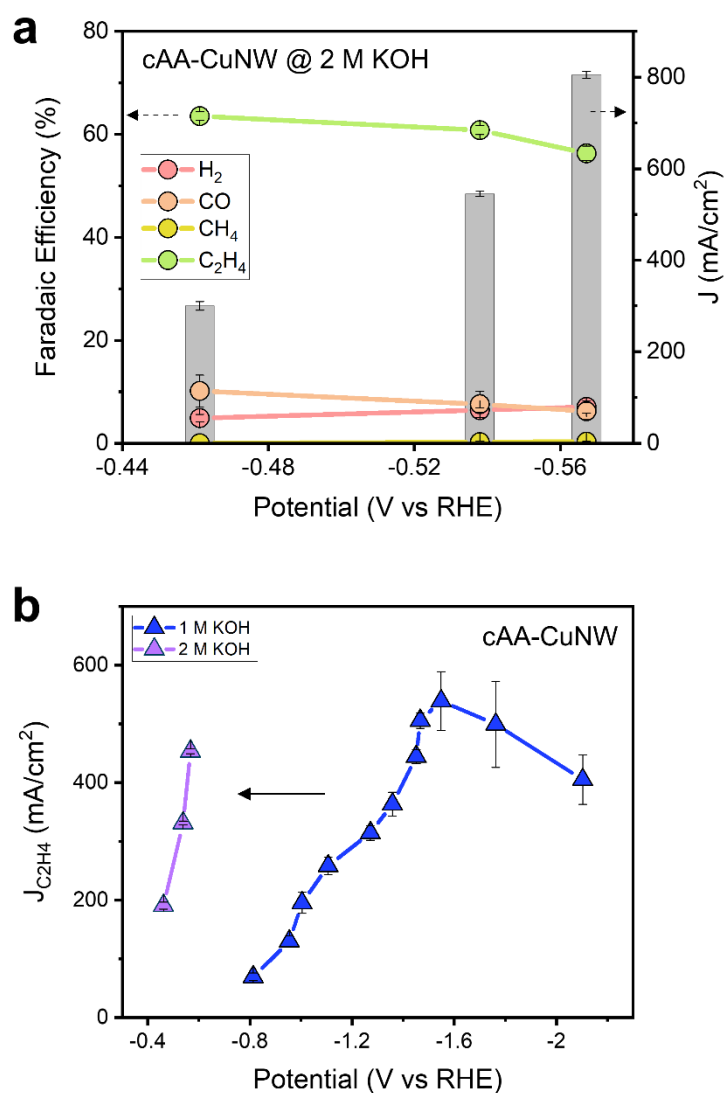

**Supplementary Fig. 33 | Effect of KOH concentration on shifting the potential of high-rate C<sub>2</sub>H<sub>4</sub> production of cAA-CuNW. a** Gaseous product FEs and total current densities for cAA-CuNW with 2 M KOH electrolyte. **b** Comparison of J<sub>C<sub>2</sub>H<sub>4</sub></sub> versus potentials of cAA-CuNW according to the KOH concentration. All the error bars represent standard deviation based on three independent samples.

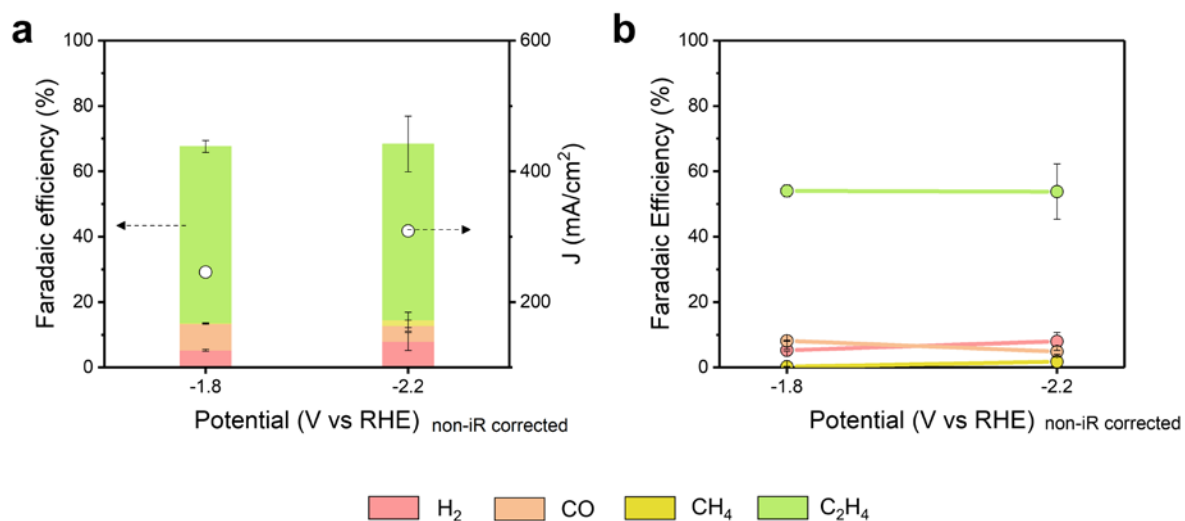

**Supplementary Fig. 34 | Gaseous product selectivity of CuNW modified with AA and GQD without a preceding reaction.** **a** Gaseous product FEs and total current densities of CuNW modified with AA and GQD without a preceding reaction. **b** Line plot of gaseous product FEs of CuNW modified with AA and GQD without a preceding reaction. The modified CuNW was prepared by wrapping with AA and GQD mixed solution through a sonication-mediated method without chemical reaction to compare with the CO<sub>2</sub>RR performance of cAA-CuNW. All the error bars represent standard deviation based on three independent measurements.

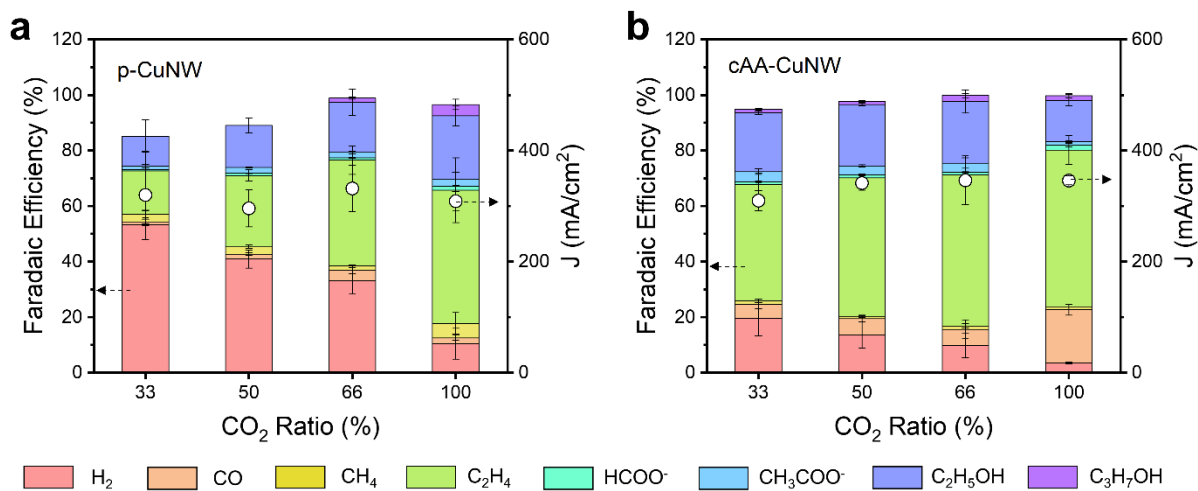

**Supplementary Fig. 35 | Investigation of CO<sub>2</sub>RR at low CO<sub>2</sub> concentration.** Gaseous product FEs and total current densities of (a) p-CuNW and (b) cAA-CuNW in the CO<sub>2</sub>RR according to CO<sub>2</sub> ratios in CO<sub>2</sub>+Ar mixed gas. All the error bars represent standard deviation based on three independent samples.

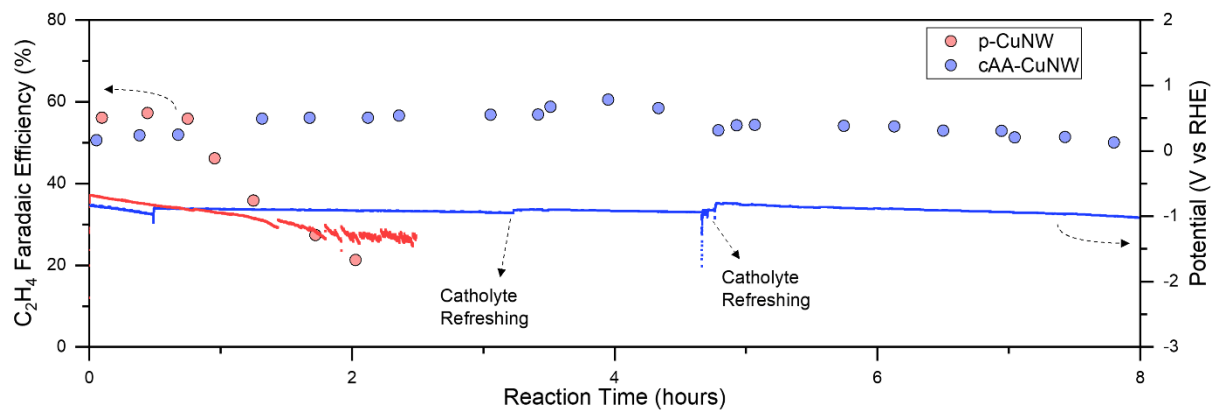

**Supplementary Fig. 36 | Comparison of CO<sub>2</sub>RR stability between p-CuNW and cAA-CuNW in flow cell electrolyzer with 1 M KOH electrolyte. CO<sub>2</sub>RR of p-CuNW and cAA-CuNW proceeded at a total current density of 300 mA/cm<sup>2</sup> by chronopotentiometry.**

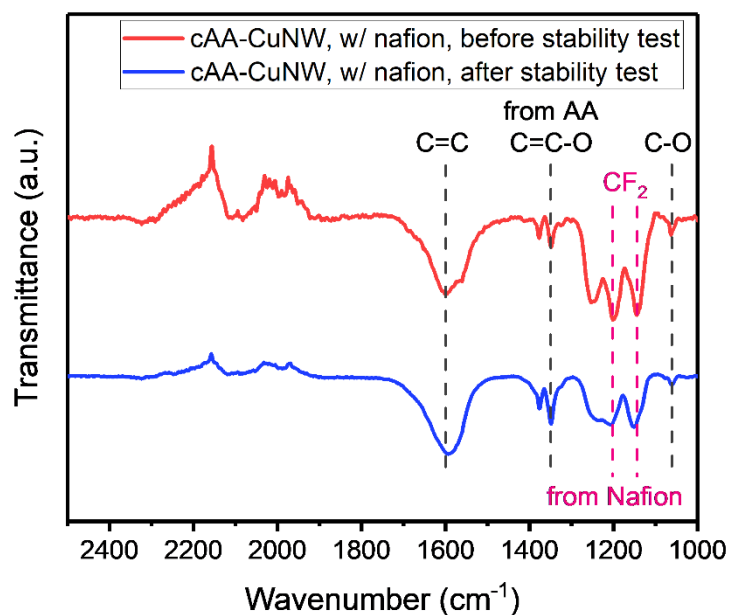

**Supplementary Fig. 37 | FT-IR spectra of cAA-CuNW before and after CO<sub>2</sub>RR stability test in the flow cell.** When we compared the FT-IR peaks before and after CO<sub>2</sub>RR of cAA-CuNW, the peaks for C=C stretching vibration, C=C–O asymmetric stretching vibration of the enol-hydroxyl group, and C–O vibration in the functional groups of AA were identical. The peaks at 1,207 and 1,153 cm<sup>-1</sup> corresponding to asymmetric and symmetric CF<sub>2</sub> stretch mode in Nafion, respectively. FT-IR analysis was performed by FT-IR spectrometer (Nicolet Continuum, Thermo Scientific) with attenuated total reflection (ATR) accessory.



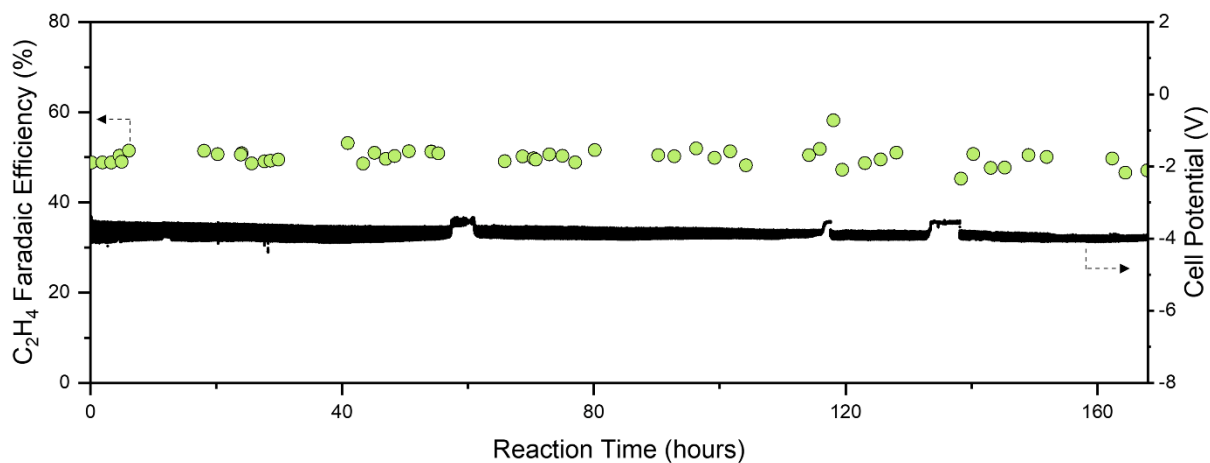

**Supplementary Fig. 38 | Long-term C<sub>2</sub>H<sub>4</sub> production of cAA-CuNW in a membrane electrode assembly (MEA) electrolyzer with 0.1 M KHCO<sub>3</sub> electrolyte.** CO<sub>2</sub>RR of cAA-CuNW proceeded at a total current density of 150 mA/cm<sup>2</sup> by chronopotentiometry. IrO<sub>2</sub> deposited Ti frit was used as an anode. The cathode and anode were separated by anion exchange membrane (Sustainion X37-50 RT, Dioxide Materials).

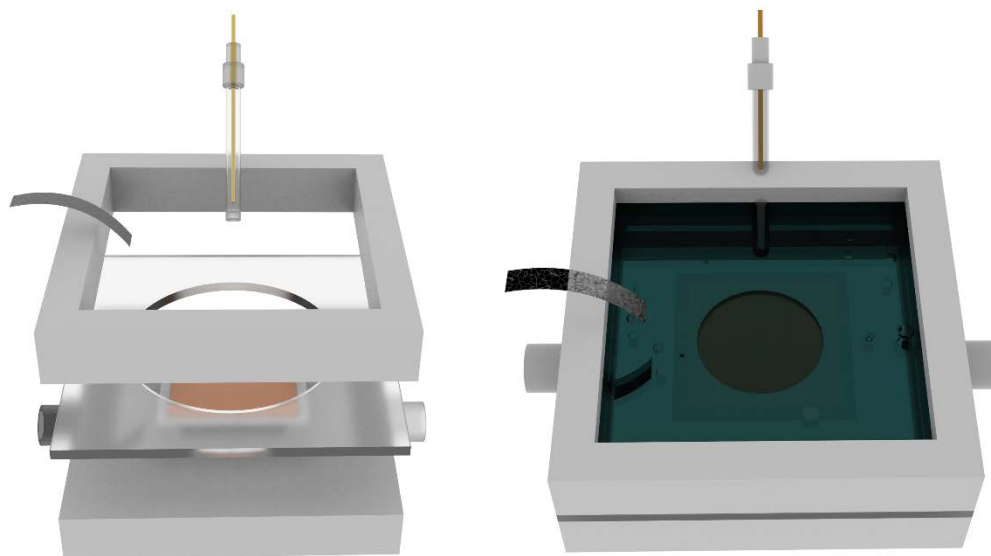

**Supplementary Fig. 39 | Schematic of the flow cell reactor for in situ Raman spectroscopic analysis during the electrochemical CO<sub>2</sub>RR.** The immersion objective lens is placed through the exposed top to observe reaction intermediates on the sample, and CO<sub>2</sub> gas is supplied from the backside of the gas diffusion electrode.

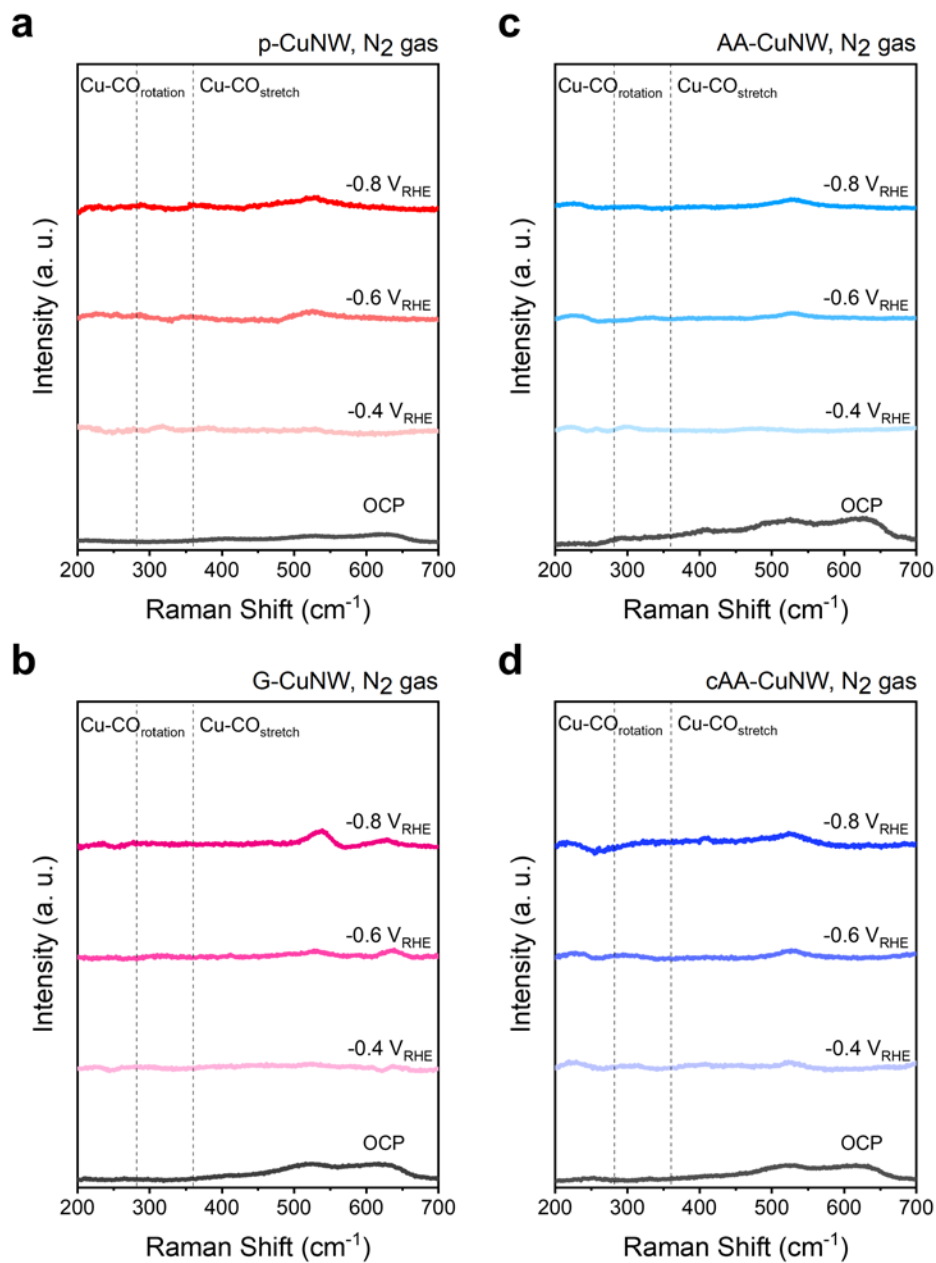

**Supplementary Fig. 40 | Real-time observation of \*CO bindings from CuNWs under N<sub>2</sub> gas.** In situ Raman spectra of (a) p-CuNW, (b) G-CuNW, (c) AA-CuNW, and (d) cAA-CuNW obtained in the region of 200-700 cm<sup>-1</sup> according to the applied potentials under N<sub>2</sub> gas.

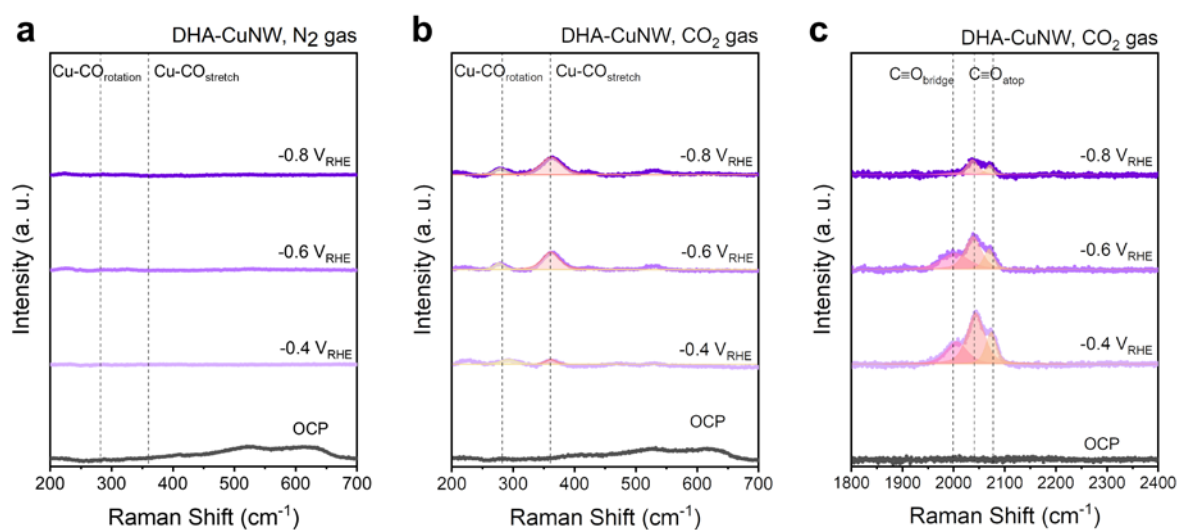

**Supplementary Fig. 41 | Real-time observation of \*CO bindings from DHA-CuNW.** In situ Raman spectra of DHA-CuNW obtained in the region of 200-700  $\text{cm}^{-1}$  according to the applied potentials under (a)  $\text{N}_2$  and (b)  $\text{CO}_2$  gas. c In situ Raman spectra of DHA-CuNW obtained in the region of 1,800-2,400  $\text{cm}^{-1}$  according to the applied potentials under  $\text{CO}_2$  gas.

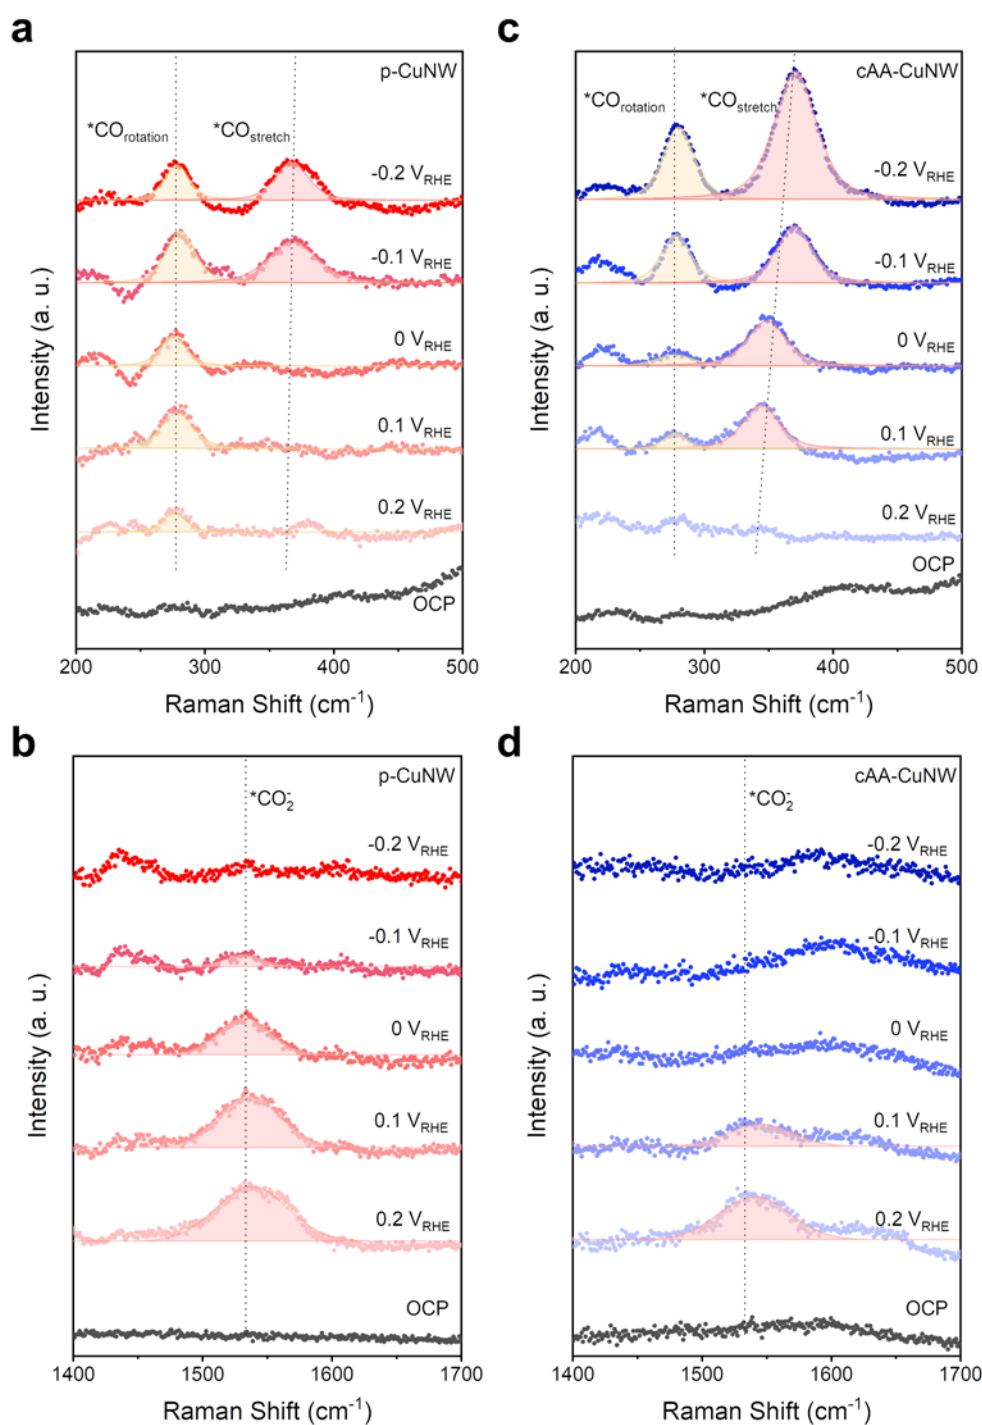

**Supplementary Fig. 42 | Monitoring  $^*\text{CO}_2^-$  on CuNWs during  $\text{CO}_2\text{RR}$ .** In situ Raman spectra of (a, b) p-CuNW and (c, d) cAA-CuNW obtained during  $\text{CO}_2\text{RR}$  according to the applied potentials in the region of 200-700  $\text{cm}^{-1}$  (top) and 1,400-1,700  $\text{cm}^{-1}$  (bottom). Cu-CO stretching peak for p-CuNW and cAA-CuNW appeared with the decrease of  $^*\text{CO}_2^-$  peak intensity.

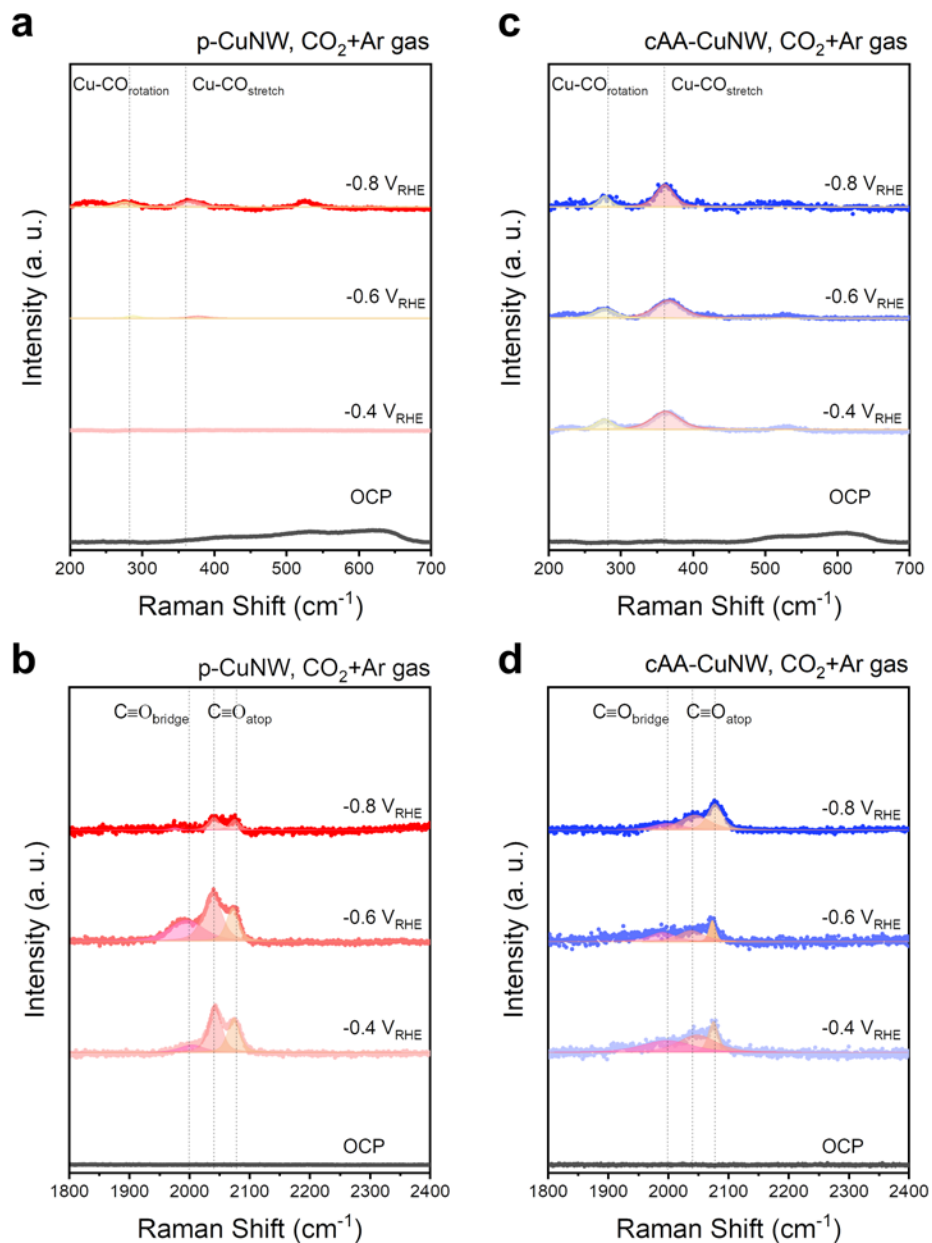

**Supplementary Fig. 43 | Real-time observation of \*CO bindings from CuNWs under CO<sub>2</sub>+Ar mixed gas.** In situ Raman spectra of (a, b) p-CuNW, and (c, d) cAA-CuNW obtained during CO<sub>2</sub>RR according to the applied potentials in the region of 200-700 cm<sup>-1</sup> (top) and 1,800-2,400 cm<sup>-1</sup> (bottom).

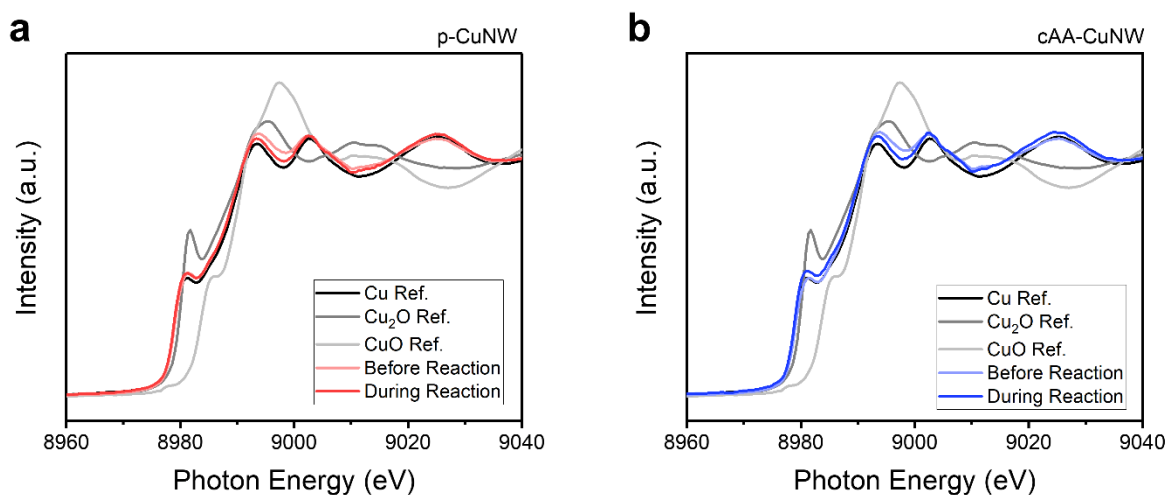

**Supplementary Fig. 44 | Real-time oxidation state analysis of p-CuNW and cAA-CuNW during the CO<sub>2</sub>RR.** Operando Cu K-edge XANES spectra obtained from (a) p-CuNW and (b) cAA-CuNW. The black and gray lines represent reference Cu and oxidized Cu spectra, respectively.

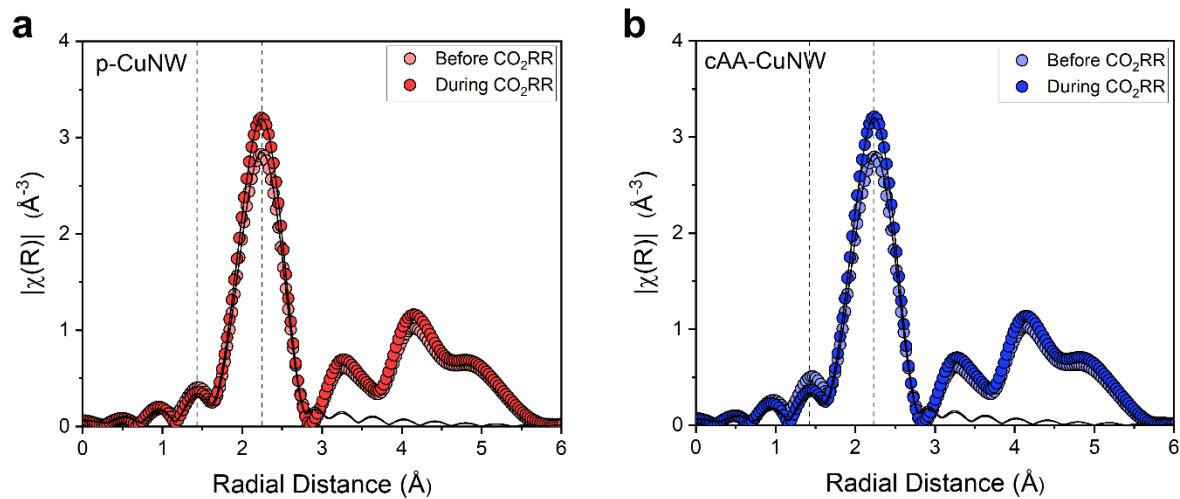

**Supplementary Fig. 45 | Fitting curves of operando Cu K-edge EXAFS in R-space for p-CuNW and cAA-CuNW before and during the  $\text{CO}_2\text{RR}$ . Experimental curves (colored circles) and fitted curves (black line) of (a) p-CuNW and (b) cAA-CuNW.**



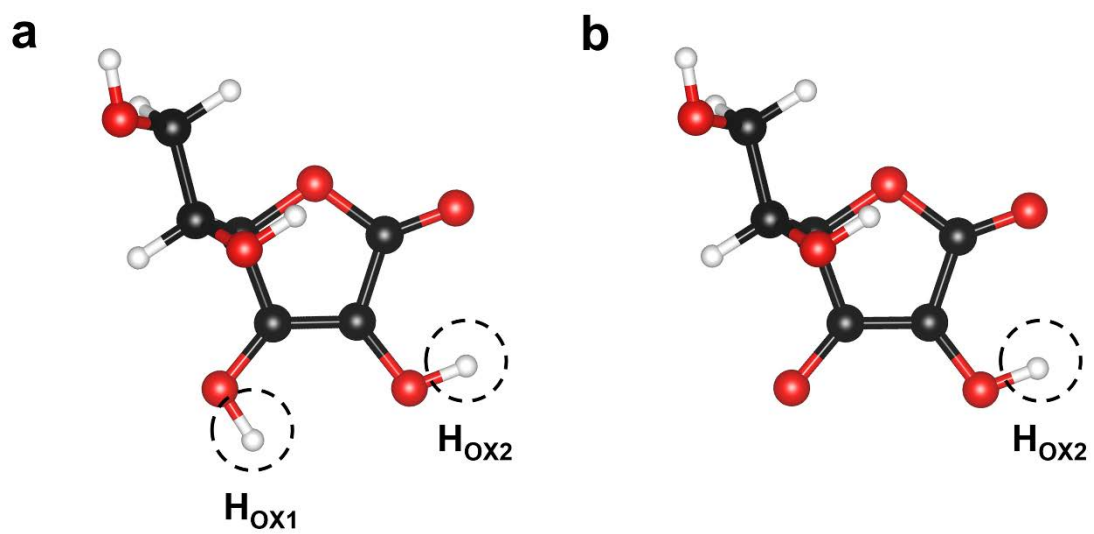

**Supplementary Fig. 46** | Atomic structures of (a) AA molecule and (b) ASC<sup>-</sup> ion. Color code: black (C), white (H) and red (O). We considered the deprotonation of H<sub>OX1</sub> for CO<sub>2</sub>RR.<sup>14</sup>

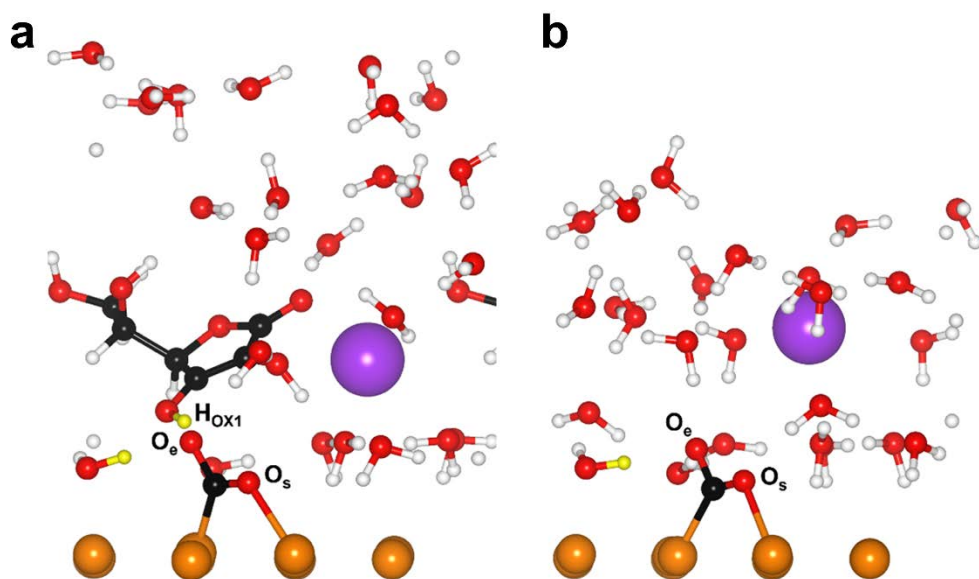

**Supplementary Fig. 47** | Atomic structures of  $\text{*CO}_2$  adsorption on (a) AA/Cu (100) and (b) Cu (100). Color code: black (C), white (H), yellow (H), red (O), purple (K), and orange (Cu). Yellow H atoms are considered for the protonation during the  $\text{CO}_2\text{RR}$ .

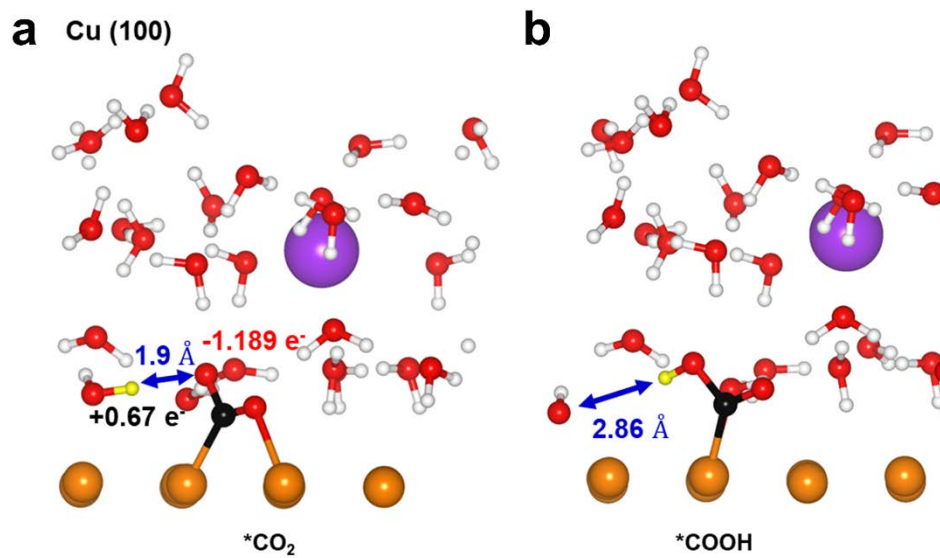

**Supplementary Fig. 48** | Atomic structures of (a) the initial and (b) the final states of  $^*CO_2$  protonation on Cu (100) ( $^*CO_2 + H_2O + e^- \rightarrow ^*COOH + OH^-$ ).

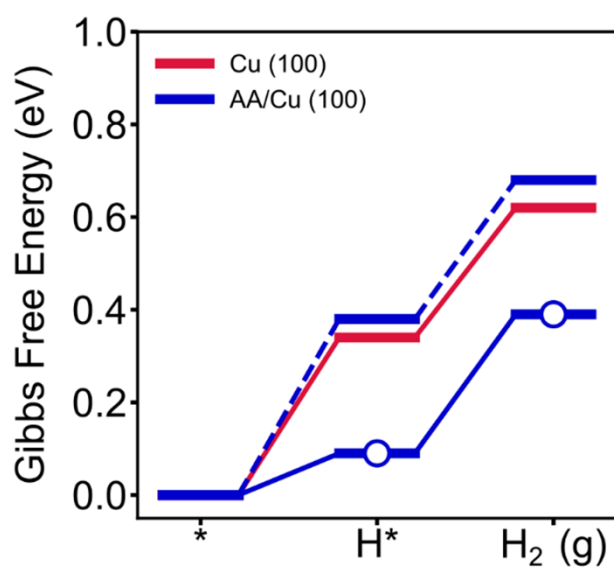

**Supplementary Fig. 49 | The Gibbs free energy diagram of the HER.** The reaction pathway involving the deprotonation of AA is highlighted with white circles, while H<sub>2</sub>O is the proton source otherwise.

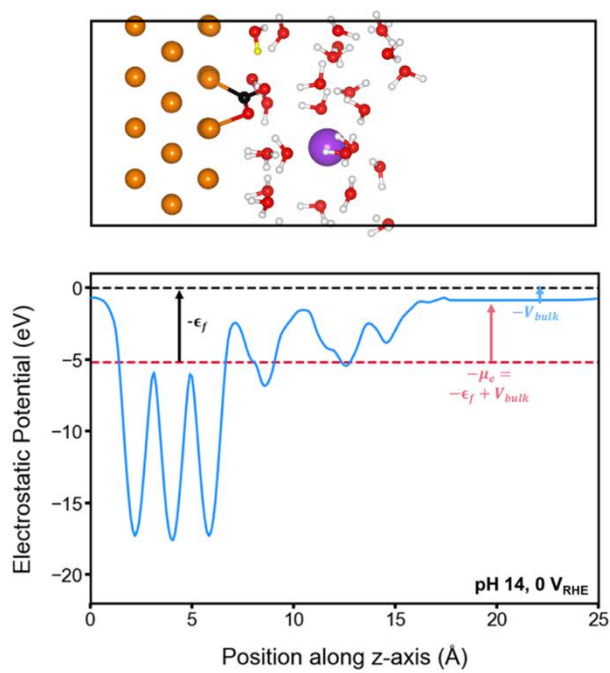

**Supplementary Fig. 50** | An illustration of \*CO<sub>2</sub> adsorption on Cu (100) and its electrostatic potential level along the z-direction at 0 V<sub>RHE</sub>.

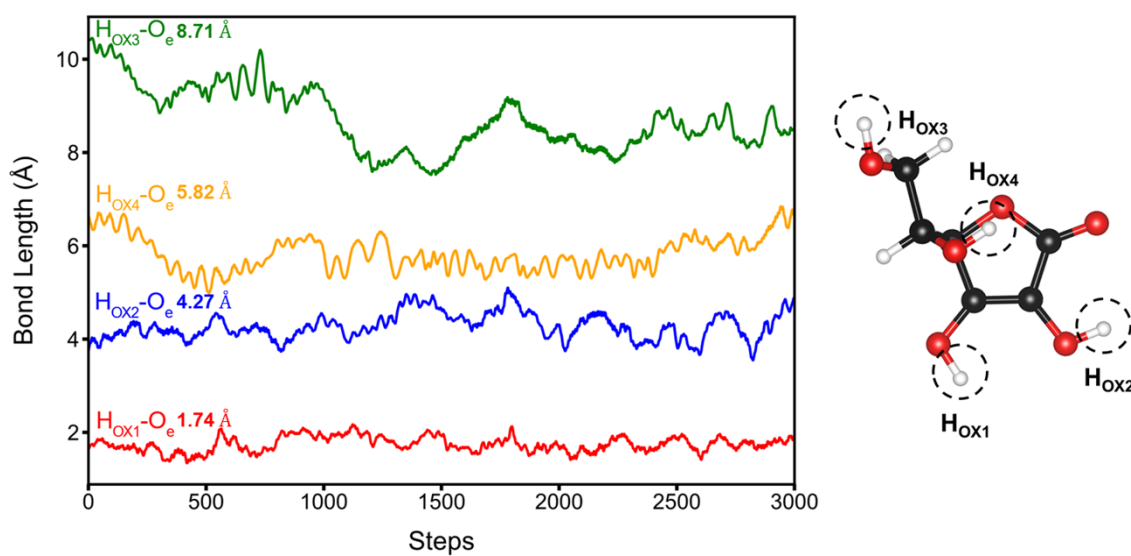

**Supplementary Fig. 51** | The bond lengths between the hydrogen atoms in four distinct OH groups ( $H_{OX1-4}$ ) in AA and the oxygen atom near the electrolyte ( $O_e$ ) of  $^*CO_2$  measured during the last 3 ps of AIMD simulations.

**Supplementary Table 1** | Comparison of various Cu-based CO<sub>2</sub>RR catalysts for high-current C<sub>2</sub>H<sub>4</sub> production.

| Catalyst                            | Cell type                      | Electrolyte                                  | J (mA/cm <sup>2</sup> ) | J <sub>C<sub>2</sub>H<sub>4</sub></sub> (mA/cm <sup>2</sup> ) | C <sub>2</sub> H <sub>4</sub> FE (%) | V (vs RHE) | Ref.                                                                      |
|-------------------------------------|--------------------------------|----------------------------------------------|-------------------------|---------------------------------------------------------------|--------------------------------------|------------|---------------------------------------------------------------------------|
| cAA-CuNW                            | Flow cell                      | 1 M KOH                                      | 888                     | 539                                                           | 60.7                                 | -1.55      | This work                                                                 |
|                                     |                                | 2 M KOH                                      | 805                     | 453                                                           | 56.3                                 | -0.57      |                                                                           |
| S-HKUST-1                           | Flow cell                      | 1 M KOH                                      | 400                     | 229                                                           | 57.2                                 | -1.32      | <i>Angew Chem. Int. Ed.</i> <b>61</b> , e202111700, (2022). <sup>15</sup> |
| Quasi-graphitic C shell on Cu       | Flow cell                      | 1 M KOH                                      | 400                     | 284.4                                                         | 71.1                                 | -0.69      | <i>Nat. Commun.</i> <b>12</b> , 3765, (2021). <sup>16</sup>               |
| Nanoporous Cu                       | Flow cell                      | 1 M KOH                                      | 653                     | 252                                                           | 38.6                                 | -0.67      | <i>Adv. Mater.</i> <b>30</b> , 1803111, (2018). <sup>17</sup>             |
| Fluorinated Cu                      | Flow cell                      | 0.75 M KOH                                   | 1,600                   | 1040                                                          | 65                                   | -0.89      | <i>Nat. Catal.</i> <b>3</b> , 478–487, (2020). <sup>18</sup>              |
| Cu NPs + Nafion on Cu               | Flow cell                      | 7 M KOH                                      | 1,550                   | 930                                                           | 60                                   | -3.23      | <i>Science</i> <b>367</b> , 661–666, (2020). <sup>19</sup>                |
| Cu(100) grown under CO <sub>2</sub> | Flow cell                      | 7 M KOH                                      | 580                     | 388                                                           | 67                                   | -0.71      | <i>Nat. Catal.</i> <b>3</b> , 98–106, (2020). <sup>20</sup>               |
| Cu film on PTFE                     | Flow cell                      | 3.5 M KOH + 5 M KI                           | 720                     | 473                                                           | 66                                   | -0.67      | <i>Science</i> <b>360</b> , 783–787, (2018). <sup>21</sup>                |
| Porous Cu                           | MEA                            | Pure Water                                   | 900                     | 420                                                           | 46.6                                 | 3.54       | <i>Nat. Energy</i> <b>7</b> , 835–843, (2022). <sup>22</sup>              |
| CAL-modified Cu                     | Slim, low-resistance flow cell | 1 M H <sub>3</sub> PO <sub>4</sub> + 3 M KCl | 1,200                   | 372                                                           | 31                                   | 4.2        | <i>Science</i> <b>372</b> , 1074–1078, (2021). <sup>23</sup>              |
| CuO NS                              | Flow cell                      | 1 M KHCO <sub>3</sub>                        | 700                     | 231                                                           | 33                                   | .          | <i>Nat. Commun.</i> <b>12</b> , 794, (2021). <sup>24</sup>                |
| Cu-12                               | Flow cell                      | 1 M KHCO <sub>3</sub>                        | 322                     | 232                                                           | 72                                   | -0.83      | <i>Nature</i> <b>577</b> , 509–513, (2020). <sup>25</sup>                 |

**Supplementary Table 2** | Cu–Cu atomic distance (R), coordination number (CN), and fitting parameters in operando EXAFS analysis of CuNW and cAA-CuNW.

| <b>Condition</b>                      | <b>Bonding</b> | <b>R (Å)</b> | <b>CN</b> | <b><math>\sigma^2</math> (Å<sup>2</sup>)</b> | <b><math>\Delta E_0</math> (eV)</b> |
|---------------------------------------|----------------|--------------|-----------|----------------------------------------------|-------------------------------------|
| p-CuNW before<br>CO <sub>2</sub> RR   | Cu-Cu          | 2.54         | 10.269    | 0.0087                                       | 5.36                                |
| p-CuNW during<br>CO <sub>2</sub> RR   | Cu-Cu          | 2.54         | 11.557    | 0.0087                                       | 5.29                                |
| cAA-CuNW before<br>CO <sub>2</sub> RR | Cu-Cu          | 2.54         | 10.266    | 0.0088                                       | 5.20                                |
| cAA-CuNW during<br>CO <sub>2</sub> RR | Cu-Cu          | 2.54         | 11.706    | 0.0089                                       | 5.07                                |



**Supplementary Table 3 | The Bader charges of adsorbates on Cu (100) and AA/Cu (100).**  
\*OCCO are more reduced on AA/Cu (100) than on Cu (100).

|                        | <b>Cu (100)</b>      | <b>AA/Cu (100)</b>   |
|------------------------|----------------------|----------------------|
| <b>*CO<sub>2</sub></b> | -1.16 e <sup>-</sup> | -1.07 e <sup>-</sup> |
| <b>*OCCO</b>           | -1.39 e <sup>-</sup> | -1.53 e <sup>-</sup> |

**Supplementary Table 4 | Gibbs free energy correction values of gaseous molecules and adsorbates.** For CO<sub>2</sub> and H<sub>2</sub>, partial pressures of 101,325 Pa were set, respectively. All values of zero-point energy (ZPE), enthalpic ( $\int C_p dT$ ), and entropic (-TΔS) contributions are given in eV.

|                           | ZPE   | $\int C_p dT$ | -TΔS   |
|---------------------------|-------|---------------|--------|
| <b>CO<sub>2</sub> (g)</b> | 0.304 | 0.098         | -0.663 |
| <b>H<sub>2</sub> (g)</b>  | 0.291 | 0.065         | -0.403 |
| <b>*CO<sub>2</sub></b>    | 0.283 | 0.101         | -0.206 |
| <b>*COOH</b>              | 0.604 | 0.102         | -0.209 |
| <b>*CO</b>                | 0.175 | 0.075         | -0.132 |
| <b>*2CO</b>               | 0.358 | 0.151         | -0.303 |
| <b>*OCCO</b>              | 0.366 | 0.135         | -0.277 |
| <b>*H</b>                 | 0.122 | 0.013         | -0.019 |

## Supplementary References

1. Garza, A. J., Bell, A. T. & Head-Gordon, M. Mechanism of CO<sub>2</sub> reduction at copper surfaces: pathways to C<sub>2</sub> products. *ACS Catal.* **8**, 1490-1499 (2018).
2. Li, Z. et al. Revisiting Reaction Kinetics of CO Electroreduction to C<sub>2+</sub> Products in a Flow Electrolyzer. *Energy Fuels* **37**, 7904-7910 (2023).
3. Zhang, T. et al. Regulation of functional groups on graphene quantum dots directs selective CO<sub>2</sub> to CH<sub>4</sub> conversion. *Nat. Commun.* **12**, 5265 (2021).
4. Dou, L. et al. Solution-processed copper/reduced-graphene-oxide core/shell nanowire transparent conductors. *ACS Nano* **10**, 2600-2606 (2016).
5. Huang, S. et al. High-performance suspended particle devices based on copper-reduced graphene oxide core-shell nanowire electrodes. *Adv. Energy Mater.* **8**, 1703658 (2018).
6. Chua, C. K. & Pumera, M. C Chemical reduction of graphene oxide: A synthetic chemistry viewpoint. *Chem. Soc. Rev.* **43**, 291-312 (2014).
7. Agarwal, V. & Zetterlund, P. B. Strategies for reduction of graphene oxide—A comprehensive review. *Chem. Eng. J.* **405**, 127018 (2021).
8. Georgakilas, V. et al. Noncovalent functionalization of graphene and graphene oxide for energy materials, biosensing, catalytic, and biomedical applications. *Chem. Rev.* **116**, 5464-5519 (2016).
9. Yang, M., Hou, Y. & Kotov, N. A. Graphene-based multilayers: Critical evaluation of materials assembly techniques. *Nano Today* **7**, 430-447 (2012).
10. Griessl, S. et al. Self-assembled two-dimensional molecular host-guest architectures from trimesic acid. *Single Mol.* **3**, 25-31 (2002).
11. Wang, Y., Shi, Z. & Yin, J. Facile synthesis of soluble graphene via a green reduction of graphene oxide in tea solution and its biocomposites. *ACS Appl. Mater. Interfaces* **3**, 1127-1133 (2011).

12. Lin, Y. et al. Tunable CO<sub>2</sub> electroreduction to ethanol and ethylene with controllable interfacial wettability. *Nat. Commun.* **14**, 3575 (2023).
13. Cho, H.-H., Yang, H., Kang, D. J. & Kim, B. J. Surface engineering of graphene quantum dots and their applications as efficient surfactants. *ACS Appl. Mater. Interfaces* **7**, 8615-8621 (2015).
14. Shen, J. et al. Ascorbate oxidation by iron, copper and reactive oxygen species: review, model development, and derivation of key rate constants. *Sci. Rep.* **11**, 7417 (2021).
15. Wen, C. F. et al. Highly ethylene-selective electrocatalytic CO<sub>2</sub> reduction enabled by isolated Cu–S motifs in metal–organic framework based precatalysts. *Angew. Chem. Int. Ed.* **61**, e202111700 (2022).
16. Kim, J.-Y. et al. Quasi-graphitic carbon shell-induced Cu confinement promotes electrocatalytic CO<sub>2</sub> reduction toward C<sub>2+</sub> products. *Nat. Commun.* **12**, 3765 (2021).
17. Lv, J.-J. et al. A highly porous copper electrocatalyst for carbon dioxide reduction. *Adv. Mater.* **30**, 1803111 (2018).
18. Ma, W. et al. Electrocatalytic reduction of CO<sub>2</sub> to ethylene and ethanol through hydrogen-assisted C–C coupling over fluorine-modified copper. *Nat. Catal.* **3**, 478–487 (2020).
19. García de Arquer, F. P. et al. CO<sub>2</sub> electrolysis to multicarbon products at activities greater than 1 A cm<sup>-2</sup>. *Science* **367**, 661–666 (2020).
20. Wang, Y. et al. Catalyst synthesis under CO<sub>2</sub> electroreduction favours faceting and promotes renewable fuels electrosynthesis. *Nat. Catal.* **3**, 98–106 (2020).
21. Dinh, C.-T. et al. CO<sub>2</sub> electroreduction to ethylene via hydroxide-mediated copper catalysis at an abrupt interface. *Science* **360**, 783–787 (2018).
22. Li, W. et al. Bifunctional ionomers for efficient co-electrolysis of CO<sub>2</sub> and pure water towards ethylene production at industrial-scale current densities. *Nat. Energy* **7**, 835-

- 843 (2022).
23. Huang, J. E. et al. CO<sub>2</sub> electrolysis to multicarbon products in strong acid. *Science* **372**, 1074-1078 (2021).
  24. Wang, X. et al. Morphology and mechanism of highly selective Cu(II) oxide nanosheet catalysts for carbon dioxide electroreduction. *Nat. Commun.* **12**, 794 (2021).
  25. Li, F. et al. Molecular tuning of CO<sub>2</sub>-to-ethylene conversion. *Nature* **577**, 509-513 (2020).
